# Supplementary material for: Selection signature analysis reveals RDH5 performed key function in vision during sheep domestication process
Source: Copernicus journal article supplement (doi:10.5194/aab-66-81-2023), 2023-02-23
Supplement: Supplementary file 1 [file Supplementary material-R2.xlsx]

## Sheet: Table S1
Table S1 The information of sequencing data and number of reads and bases in quality control
Species/Population	Abbreviation	Breed origin	Characteristics	Accession ID	Raw Base(bp)	Raw reads	Mapped reads	Q20 (%)	Q30 (%)
Asiatic mouflon	MOU	Middle East	Wild ancestor	SRR11657500	101032809000	673552060	664909216	96.65	91.82
				SRR11657506	78294935700	521966238	515230966	96.39	91.31
				SRR11657503	80345874000	535639160	528684742	96.81	92.37
				SRR11657505	94292616000	628617440	622054825	96.5	91.48
				SRR11657502	83849304900	558995366	551785720	96.92	92.59
				SRR11657636	78326190300	522174602	515430563	96.9	92.48
				SRR11657637	83435966400	556239776	550485094	96.5	91.6
				SRR11657638	96068786400	640458576	633642335	96.59	91.88
				SRR11657639	90326016900	602173446	595617700	96.76	92.1
				SRR11657642	85463094000	569753960	561199997	97.48	93.78
				SRR11657640	115561230900	770408206	758960345	97.07	92.77
				SRR11657641	80339804400	535598696	528717718	97.07	92.88
Hu sheep	Hu	Jiangsu province, China	Native, early puberty, prolific	SRX1487561	16941111716	134483810	127791003	92.75	95.96
				SRX1487569	19804777293	157195156	149877306	92.93	96.15
				SRX1487570	19189499067	152312646	144661708	92.43	95.87
				SRX1487584	18358750459	145711816	138191354	87.94	92.63
				SRX1487586	17735569499	140770132	131808996	85.1	90.3
				SRX1493361	19211987830	152493066	145250592	92.7	96.04
				SRX1493362	16836200150	133671640	126450364	93.76	96.42
				SRX1493364	18097604913	143671070	136774898	85.27	91.34
				SRX1493390	19892250484	157882172	147708736	89.32	93.32
				SRX1493391	18248497911	144865774	137911973	84.87	91.07
		Hubei province, China		SRR13426387	31154641650	104051499	103994055	97.41	93.04
				SRR13426386	36481291442	121969592	121871560	97.42	92.94
				SRR13426395	32213262016	107600160	107522103	97.14	92.43
				SRR13426394	33317868098	111335200	111251545	97.51	93.16
				SRR13426393	30164709030	100857800	100717038	97.74	93.72
				SRR13426392	41780125274	139555612	139488217	97.45	93.02
				SRR13426391	30304368270	101378808	101178254	97.17	92.42
				SRR13426390	30827083160	102962143	102903601	97.65	93.6
				SRR13426389	32812703304	109624648	109537282	97.93	94.21
				SRS7672560	31374324330	104914322	104724624	97.51	93.31
				SRS7672561	30027878998	100447899	100237836	98.28	95.1
				SRS7672562	34865758408	116569376	116379318	97.33	92.89
				SRS7672563	33254969350	111169165	111004026	97.48	93.22
				SRS7672564	43238422690	144633663	144332379	97.44	93.19
				SRS7672565	31275879618	104666180	104394421	97.54	93.58
				SRS7672566	38635148566	129194773	128960081	98.28	95.01
				SRS7672567	29845488082	99768157	99619201	97.39	93.07
				SRS7672568	29411335282	98341536	98181466	97.6	93.53
				SRS7672569	29977652650	100250520	100060777	97.51	93.38
				SRS7672570	31043602894	103803040	103624396	97.55	93.4
				SRS7672571	28470921338	95178993	95030542	97.55	93.4
				SRS7672572	29378618456	98222302	98066177	97.44	93.19
				SRS7672573	37571778054	125646382	125412564	97.35	92.93
				SRS7672574	34354126704	114888666	114676207	97.75	93.86
				SRS7672575	29272907496	97826877	97705718	96.68	91.36
				SRS7672576	29458145482	98490369	98332124	97.41	93.11
				SRS7672577	29465752670	98480819	98358468	97.55	93.3
				SRS7672578	34742207588	116096806	115966297	98.12	94.46
				SRS7672579	36562196350	122250684	122041264	97.33	92.88
				SRS7672580	37060204042	123936411	123702337	97.66	93.66
				SRS7672581	34780011926	116312184	116093005	98.13	94.68
				SRS7672582	30643357736	102518326	102281516	97.52	93.42
				SRS7672583	41037148544	137197677	136976620	97.72	93.77
				SRS7672584	30395805464	101591556	101454146	97.41	93.1
				SRS7672585	30826361536	103048491	102893593	97.63	93.61
				SRS7672586	31698129362	106023232	105808322	97.7	93.68
				SRS7672587	30816984230	103104690	102871766	97.65	93.52
				SRS7672588	30352266602	101511189	101309867	98	94.38
				SRS7672589	31309964640	104740116	104545346	97.68	96.3
				SRS7672590	31923028984	106730174	106552436	97.63	93.58
				SRS7672591	33850914398	113332916	112992096	97.25	92.77
				SRS7672592	31521294678	105413698	105209937	97.35	93.02
				SRS7672593	30989771192	103606830	103436322	97.3	92.87
				SRS7672594	29405499576	98315784	98146461	97.31	92.98
				SRS7672595	35046310064	117155500	116977081	97.43	93.17
				SRS7672596	35193316224	117799843	117467710	97.32	92.99
				SRS7672597	32487133144	108626930	108433158	97.18	92.61
				SRS7672598	33041748986	110508256	110295773	97.26	92.78
				SRS7672599	31613968406	105783115	105538666	97.78	93.84

## Sheet: Table S2
Table S2 The detailed information of 755 positive selected genes between Asiatic Mouflon and Domestic Hu sheep
Gene stable ID	Gene name	Chromosome/scaffold name	Strand	Gene start (bp)	Gene end (bp)	Gene description
ENSOARG00000000039		15	1	47700418	47701423	olfactory receptor 52A1-like [Source:NCBI gene (formerly Entrezgene);Acc:101104933]
ENSOARG00000000042	CYP2E1	22	1	50692314	50706424	cytochrome P450, family 2, subfamily E, polypeptide 1 [Source:NCBI gene (formerly Entrezgene);Acc:100568285]
ENSOARG00000000045		15	1	47724520	47725667	olfactory receptor 52A1 [Source:NCBI gene (formerly Entrezgene);Acc:101105186]
ENSOARG00000000053	HAO1	13	-1	50003573	50063325	hydroxyacid oxidase 1 [Source:NCBI gene (formerly Entrezgene);Acc:101118465]
ENSOARG00000000111	SHISA4	12	1	78933863	78935736	shisa family member 4 [Source:NCBI gene (formerly Entrezgene);Acc:101113425]
ENSOARG00000000119		12	-1	78941607	78965717
ENSOARG00000000122	GGT6	11	-1	24650866	24653300	gamma-glutamyltransferase 6 [Source:NCBI gene (formerly Entrezgene);Acc:101102912]
ENSOARG00000000145	FAM167B	2	-1	234389749	234390849	family with sequence similarity 167 member B [Source:NCBI gene (formerly Entrezgene);Acc:101115189]
ENSOARG00000000184	CAMK4	5	1	107540852	107812560	calcium/calmodulin dependent protein kinase IV [Source:HGNC Symbol;Acc:HGNC:1464]
ENSOARG00000000213	ZNF212	4	1	111703384	111706780	zinc finger protein 212 [Source:HGNC Symbol;Acc:HGNC:13004]
ENSOARG00000000239		12	1	78970333	78985034	translocase of inner mitochondrial membrane 17A [Source:NCBI gene (formerly Entrezgene);Acc:101113949]
ENSOARG00000000244		2	1	234395541	234403556	myotubularin-related protein 9 [Source:NCBI gene (formerly Entrezgene);Acc:101115435]
ENSOARG00000000251	ADRA1D	13	1	50244852	50271004	alpha-1D adrenergic receptor [Source:NCBI gene (formerly Entrezgene);Acc:100170316]
ENSOARG00000000274	TEKT1	11	-1	24665133	24678529	tektin 1 [Source:NCBI gene (formerly Entrezgene);Acc:101103164]
ENSOARG00000000284	ZNF777	4	-1	111802118	111829406	zinc finger protein 777 [Source:NCBI gene (formerly Entrezgene);Acc:101121510]
ENSOARG00000000318		11	1	27434978	27447265	phosphoribosylformylglycinamidine synthase [Source:NCBI gene (formerly Entrezgene);Acc:101122962]
ENSOARG00000000333	ADAMTS7	18	1	29375835	29423578	ADAM metallopeptidase with thrombospondin type 1 motif 7 [Source:NCBI gene (formerly Entrezgene);Acc:101114142]
ENSOARG00000000341	RNPEP	12	1	78996222	79007748	arginyl aminopeptidase [Source:HGNC Symbol;Acc:HGNC:10078]
ENSOARG00000000369	ECHS1	22	1	50733609	50740406	enoyl-CoA hydratase, short chain 1 [Source:NCBI gene (formerly Entrezgene);Acc:101112867]
ENSOARG00000000380		11	-1	27451572	27455340
ENSOARG00000000381		19	1	47798272	47835571	RFT1 homolog [Source:NCBI gene (formerly Entrezgene);Acc:101107904]
ENSOARG00000000399	TBC1D2B	18	-1	29428283	29515082	TBC1 domain family member 2B [Source:NCBI gene (formerly Entrezgene);Acc:101114393]
ENSOARG00000000458	SFMBT1	19	1	47861509	47970530	Scm like with four mbt domains 1 [Source:NCBI gene (formerly Entrezgene);Acc:101108168]
ENSOARG00000000500	RNF24	13	1	50566401	50607606	ring finger protein 24 [Source:NCBI gene (formerly Entrezgene);Acc:101119578]
ENSOARG00000000505		3	-1	103593	181006
ENSOARG00000000512		13	-1	21673715	21792885
ENSOARG00000000518		3	-1	178521	229353
ENSOARG00000000523	RANGRF	11	1	27465249	27467133	RAN guanine nucleotide release factor [Source:NCBI gene (formerly Entrezgene);Acc:101107111]
ENSOARG00000000524	SKIDA1	13	-1	21810812	21813343	SKI/DACH domain containing 1 [Source:NCBI gene (formerly Entrezgene);Acc:101112839]
ENSOARG00000000544	ELF3	12	1	79008318	79012328	E74 like ETS transcription factor 3 [Source:NCBI gene (formerly Entrezgene);Acc:101104676]
ENSOARG00000000592	UNC5CL	20	-1	15033547	15042800	unc-5 family C-terminal like [Source:NCBI gene (formerly Entrezgene);Acc:101107479]
ENSOARG00000000599		12	1	79068632	79071192
ENSOARG00000000637	EHMT1	3	-1	264533	336445	euchromatic histone lysine methyltransferase 1 [Source:HGNC Symbol;Acc:HGNC:24650]
ENSOARG00000000645	SMTNL2	11	-1	24702544	24715194	smoothelin like 2 [Source:NCBI gene (formerly Entrezgene);Acc:101112746]
ENSOARG00000000668	ARRDC1	3	-1	384378	390689	arrestin domain containing 1 [Source:HGNC Symbol;Acc:HGNC:28633]
ENSOARG00000000669	SLC25A35	11	-1	27467679	27470629	solute carrier family 25 member 35 [Source:NCBI gene (formerly Entrezgene);Acc:101107368]
ENSOARG00000000679	TSPO2	20	1	15049959	15051251	translocator protein 2 [Source:NCBI gene (formerly Entrezgene);Acc:105606555]
ENSOARG00000000687		12	-1	79084614	79091698
ENSOARG00000000698	MLLT10	13	1	21878329	22040516	MLLT10 histone lysine methyltransferase DOT1L cofactor [Source:NCBI gene (formerly Entrezgene);Acc:101113089]
ENSOARG00000000750	PANK2	13	-1	50616964	50645766	pantothenate kinase 2 [Source:NCBI gene (formerly Entrezgene);Acc:100217410]
ENSOARG00000000775		3	1	409627	411217
ENSOARG00000000793	DPH7	3	1	421582	441513	diphthamide biosynthesis 7 [Source:NCBI gene (formerly Entrezgene);Acc:101102470]
ENSOARG00000000820	APOBEC2	20	1	15063505	15073864	apolipoprotein B mRNA editing enzyme catalytic subunit 2 [Source:NCBI gene (formerly Entrezgene);Acc:101103930]
ENSOARG00000000848	ARHGEF15	11	1	27489458	27497702	Rho guanine nucleotide exchange factor 15 [Source:NCBI gene (formerly Entrezgene);Acc:101107803]
ENSOARG00000000852	OARD1	20	-1	15079876	15084243	O-acyl-ADP-ribose deacylase 1 [Source:NCBI gene (formerly Entrezgene);Acc:101104185]
ENSOARG00000000894	NFYA	20	1	15092902	15108802	nuclear transcription factor Y subunit alpha [Source:NCBI gene (formerly Entrezgene);Acc:101104434]
ENSOARG00000000920	PNPLA7	3	1	446617	523620	patatin like phospholipase domain containing 7 [Source:HGNC Symbol;Acc:HGNC:24768]
ENSOARG00000000966	LIN52	7	1	82354750	82470057	lin-52 DREAM MuvB core complex component [Source:NCBI gene (formerly Entrezgene);Acc:101106081]
ENSOARG00000000992	VSX2	7	1	82506652	82525293	visual system homeobox 2 [Source:NCBI gene (formerly Entrezgene);Acc:101106436]
ENSOARG00000001030	ABCD4	7	-1	82539860	82554033	ATP binding cassette subfamily D member 4 [Source:NCBI gene (formerly Entrezgene);Acc:101106333]
ENSOARG00000001044		11	1	27513261	27518099	outer dense fiber of sperm tails 4 [Source:NCBI gene (formerly Entrezgene);Acc:101123477]
ENSOARG00000001045	DNAJC1	13	-1	22055134	22244166	DnaJ heat shock protein family (Hsp40) member C1 [Source:NCBI gene (formerly Entrezgene);Acc:101102829]
ENSOARG00000001053	SYNDIG1L	7	-1	82622260	82627746	synapse differentiation inducing 1 like [Source:NCBI gene (formerly Entrezgene);Acc:101106851]
ENSOARG00000001082	KRBA2	11	-1	27535473	27539333	KRAB-A domain containing 2 [Source:NCBI gene (formerly Entrezgene);Acc:101108063]
ENSOARG00000001198		11	-1	27540713	27544548	ribosomal protein L26 [Source:NCBI gene (formerly Entrezgene);Acc:106990100]
ENSOARG00000001504	SREBF1	11	1	34176887	34191779	sterol regulatory element binding transcription factor 1 [Source:NCBI gene (formerly Entrezgene);Acc:100329218]
ENSOARG00000001590	RAI1	11	-1	34194577	34205303	retinoic acid induced 1 [Source:NCBI gene (formerly Entrezgene);Acc:101112660]
ENSOARG00000001908	CSPG4	18	1	32077781	32112613	chondroitin sulfate proteoglycan 4 [Source:NCBI gene (formerly Entrezgene);Acc:101105108]
ENSOARG00000001949	ARHGAP26	5	1	51190660	51671936	Rho GTPase activating protein 26 [Source:NCBI gene (formerly Entrezgene);Acc:101109966]
ENSOARG00000001956	SNX33	18	-1	32128688	32136866	sorting nexin 33 [Source:NCBI gene (formerly Entrezgene);Acc:101105362]
ENSOARG00000001983	WDR5B	1	-1	185127233	185128225	WD repeat domain 5B [Source:NCBI gene (formerly Entrezgene);Acc:101113552]
ENSOARG00000001991	SNUPN	18	1	32173543	32187847	snurportin 1 [Source:NCBI gene (formerly Entrezgene);Acc:101105604]
ENSOARG00000002023	VSTM5	21	1	484659	485376	V-set and transmembrane domain containing 5 [Source:NCBI gene (formerly Entrezgene);Acc:101106473]
ENSOARG00000002056	PTPN9	18	1	32205183	32275996	protein tyrosine phosphatase non-receptor type 9 [Source:NCBI gene (formerly Entrezgene);Acc:101105855]
ENSOARG00000002077		21	-1	496911	524737	mediator complex subunit 17 [Source:NCBI gene (formerly Entrezgene);Acc:101106726]
ENSOARG00000002081	MAST2	1	1	20357495	20388272	microtubule associated serine/threonine kinase 2 [Source:NCBI gene (formerly Entrezgene);Acc:101111852]
ENSOARG00000002146	C11orf54	21	-1	538256	557547	chromosome 21 C11orf54 homolog [Source:NCBI gene (formerly Entrezgene);Acc:101118909]
ENSOARG00000002180		1	-1	20395749	20495223	phosphoinositide-3-kinase regulatory subunit 3 [Source:NCBI gene (formerly Entrezgene);Acc:101123247]
ENSOARG00000002221	SIN3A	18	1	32306824	32350121	SIN3 transcription regulator family member A [Source:NCBI gene (formerly Entrezgene);Acc:101106112]
ENSOARG00000002277		3	-1	1442982	2818577
ENSOARG00000002300	VPS13B	9	-1	77057424	77839842	vacuolar protein sorting 13 homolog B [Source:NCBI gene (formerly Entrezgene);Acc:101104761]
ENSOARG00000002424	MAN2C1	18	1	32353253	32364572	mannosidase alpha class 2C member 1 [Source:NCBI gene (formerly Entrezgene);Acc:101118225]
ENSOARG00000002477	NEIL1	18	-1	32365507	32371937	nei like DNA glycosylase 1 [Source:NCBI gene (formerly Entrezgene);Acc:101106367]
ENSOARG00000002512	COMMD4	18	-1	32381605	32386854	COMM domain containing 4 [Source:NCBI gene (formerly Entrezgene);Acc:101106628]
ENSOARG00000002552		18	-1	32413552	32414976
ENSOARG00000002566		18	1	32423997	32426423
ENSOARG00000002579		13	-1	23302396	23385761
ENSOARG00000002658	C15orf39	18	-1	32440290	32450602	chromosome 18 C15orf39 homolog [Source:NCBI gene (formerly Entrezgene);Acc:101106884]
ENSOARG00000002726	PPCDC	18	-1	32579001	32598213	phosphopantothenoylcysteine decarboxylase [Source:NCBI gene (formerly Entrezgene);Acc:101107138]
ENSOARG00000002761	SCAMP5	18	-1	32606249	32612056	secretory carrier membrane protein 5 [Source:HGNC Symbol;Acc:HGNC:30386]
ENSOARG00000002773	GMDS	20	1	50065679	50397477	GDP-mannose 4,6-dehydratase [Source:NCBI gene (formerly Entrezgene);Acc:101101931]
ENSOARG00000002972	ZDHHC1	14	-1	34349965	34361662	zinc finger DHHC-type containing 1 [Source:NCBI gene (formerly Entrezgene);Acc:101108247]
ENSOARG00000002973	KCNN3	1	-1	103499249	103661332	potassium calcium-activated channel subfamily N member 3 [Source:NCBI gene (formerly Entrezgene);Acc:101112614]
ENSOARG00000002986	HSD11B2	14	1	34383881	34389053	hydroxysteroid 11-beta dehydrogenase 2 [Source:NCBI gene (formerly Entrezgene);Acc:443530]
ENSOARG00000002996	ATP6V0D1	14	-1	34390423	34427751	ATPase H+ transporting V0 subunit d1 [Source:NCBI gene (formerly Entrezgene);Acc:101108509]
ENSOARG00000003006	AGRP	14	-1	34428539	34429286	agouti related neuropeptide [Source:NCBI gene (formerly Entrezgene);Acc:443269]
ENSOARG00000003027	RIPOR1	14	1	34463314	34472366	RHO family interacting cell polarization regulator 1 [Source:NCBI gene (formerly Entrezgene);Acc:101114044]
ENSOARG00000003053	CTCF	14	1	34489522	34526078	CCCTC-binding factor [Source:NCBI gene (formerly Entrezgene);Acc:101114297]
ENSOARG00000003068		15	1	2812872	2851062	caspase-1-like [Source:NCBI gene (formerly Entrezgene);Acc:101117013]
ENSOARG00000003079	CARMIL2	14	1	34533553	34545235	capping protein regulator and myosin 1 linker 2 [Source:NCBI gene (formerly Entrezgene);Acc:101108771]
ENSOARG00000003098	ACD	14	-1	34545356	34551176	ACD shelterin complex subunit and telomerase recruitment factor [Source:NCBI gene (formerly Entrezgene);Acc:101109037]
ENSOARG00000003109	PARD6A	14	1	34552010	34553872	par-6 family cell polarity regulator alpha [Source:NCBI gene (formerly Entrezgene);Acc:101114893]
ENSOARG00000003118	ENKD1	14	-1	34554399	34557323	enkurin domain containing 1 [Source:NCBI gene (formerly Entrezgene);Acc:101115148]
ENSOARG00000003128	C16orf86	14	1	34557845	34559467	chromosome 14 C16orf86 homolog [Source:NCBI gene (formerly Entrezgene);Acc:101115393]
ENSOARG00000003135	GFOD2	14	-1	34563019	34573806	glucose-fructose oxidoreductase domain containing 2 [Source:NCBI gene (formerly Entrezgene);Acc:101115644]
ENSOARG00000003301	EXOC2	20	1	50814198	50938070	exocyst complex component 2 [Source:NCBI gene (formerly Entrezgene);Acc:101110975]
ENSOARG00000003529	MRPL20	12	1	49201530	49204199	mitochondrial ribosomal protein L20 [Source:NCBI gene (formerly Entrezgene);Acc:101105837]
ENSOARG00000003568	AKAP8	5	1	7547600	7561201	A-kinase anchoring protein 8 [Source:NCBI gene (formerly Entrezgene);Acc:101119815]
ENSOARG00000003640	BRD4	5	1	7579941	7664534	bromodomain containing 4 [Source:NCBI gene (formerly Entrezgene);Acc:101123297]
ENSOARG00000003648	CCNL2	12	1	49206920	49216787	cyclin L2 [Source:HGNC Symbol;Acc:HGNC:20570]
ENSOARG00000003746	DIPK1B	3	-1	2693740	2698054	divergent protein kinase domain 1B [Source:HGNC Symbol;Acc:HGNC:28290]
ENSOARG00000003764	AGPAT2	3	1	2728311	2731922	1-acylglycerol-3-phosphate O-acyltransferase 2 [Source:NCBI gene (formerly Entrezgene);Acc:101114511]
ENSOARG00000003767	EPHX3	5	1	7669684	7673094	epoxide hydrolase 3 [Source:NCBI gene (formerly Entrezgene);Acc:101120077]
ENSOARG00000003778	EGFL7	3	-1	2733290	2735571	EGF like domain multiple 7 [Source:NCBI gene (formerly Entrezgene);Acc:101114767]
ENSOARG00000003795		3	1	2785362	2941930
ENSOARG00000003822	IRF4	20	-1	50972069	50985668	interferon regulatory factor 4 [Source:NCBI gene (formerly Entrezgene);Acc:101111234]
ENSOARG00000003838	AURKAIP1	12	1	49217180	49222771	aurora kinase A interacting protein 1 [Source:NCBI gene (formerly Entrezgene);Acc:101106608]
ENSOARG00000003869	DUSP22	20	-1	51025192	51054817	dual specificity phosphatase 22 [Source:HGNC Symbol;Acc:HGNC:16077]
ENSOARG00000003922	MXRA8	12	1	49244103	49247665	matrix remodeling associated 8 [Source:NCBI gene (formerly Entrezgene);Acc:101103998]
ENSOARG00000003953		6	-1	71801397	71837607	phosphoribosyl pyrophosphate amidotransferase [Source:NCBI gene (formerly Entrezgene);Acc:101109095]
ENSOARG00000003966	NOTCH3	5	1	7691090	7726339	notch receptor 3 [Source:NCBI gene (formerly Entrezgene);Acc:101123554]
ENSOARG00000004051	DVL1	12	1	49251662	49262858	dishevelled segment polarity protein 1 [Source:NCBI gene (formerly Entrezgene);Acc:101104259]
ENSOARG00000004061	CA10	11	-1	271266	298608	carbonic anhydrase 10 [Source:HGNC Symbol;Acc:HGNC:1369]
ENSOARG00000004169		26	1	21279713	21279910
ENSOARG00000004185		6	1	71842617	71855328	phosphoribosylaminoimidazole carboxylase and phosphoribosylaminoimidazolesuccinocarboxamide synthase [Source:NCBI gene (formerly Entrezgene);Acc:101117419]
ENSOARG00000004245	ARID1B	8	1	80106814	80481520	AT-rich interaction domain 1B [Source:NCBI gene (formerly Entrezgene);Acc:101108839]
ENSOARG00000004289	TAS1R3	12	-1	49264665	49267724	taste 1 receptor member 3 [Source:NCBI gene (formerly Entrezgene);Acc:101104514]
ENSOARG00000004305	FAF1	1	-1	24699378	25184908	Fas associated factor 1 [Source:NCBI gene (formerly Entrezgene);Acc:101108967]
ENSOARG00000004329	SRP72	6	1	71861090	71889051	signal recognition particle 72 [Source:NCBI gene (formerly Entrezgene);Acc:101109358]
ENSOARG00000004391		25	1	17474926	17633357	ciliary associated calcium binding coiled-coil 1 [Source:NCBI gene (formerly Entrezgene);Acc:101121486]
ENSOARG00000004478	CPTP	12	-1	49270313	49271132	ceramide-1-phosphate transfer protein [Source:NCBI gene (formerly Entrezgene);Acc:101107298]
ENSOARG00000004506		13	1	23442415	23443185
ENSOARG00000004516	UBOX5	13	1	51361236	51410710	U-box domain containing 5 [Source:NCBI gene (formerly Entrezgene);Acc:101123317]
ENSOARG00000004595	OXT	13	-1	51437893	51438654	oxytocin/neurophysin I prepropeptide [Source:NCBI gene (formerly Entrezgene);Acc:443390]
ENSOARG00000004602	HCAR1	17	1	52373620	52374627	hydroxycarboxylic acid receptor 1 [Source:NCBI gene (formerly Entrezgene);Acc:101119758]
ENSOARG00000004617		17	1	52390362	52391453	hydroxycarboxylic acid receptor 2 [Source:NCBI gene (formerly Entrezgene);Acc:101102014]
ENSOARG00000004618	ARL9	6	1	71890391	71904893	ADP ribosylation factor like GTPase 9 [Source:HGNC Symbol;Acc:HGNC:23592]
ENSOARG00000004656		13	-1	51453752	51455892	mitochondrial ribosomal protein S26 [Source:NCBI gene (formerly Entrezgene);Acc:101112501]
ENSOARG00000004725	INTS11	12	1	49273994	49283355	integrator complex subunit 11 [Source:NCBI gene (formerly Entrezgene);Acc:101104768]
ENSOARG00000004754	THEGL	6	1	71911283	71951439	theg spermatid protein like [Source:NCBI gene (formerly Entrezgene);Acc:101117932]
ENSOARG00000004757	NPBWR2	13	1	53097296	53098312	neuropeptides B and W receptor 2 [Source:NCBI gene (formerly Entrezgene);Acc:101107300]
ENSOARG00000004827	MC3R	13	-1	58930876	58931850	melanocortin 3 receptor [Source:NCBI gene (formerly Entrezgene);Acc:101119579]
ENSOARG00000004890		17	-1	72184865	72185047
ENSOARG00000004900		17	-1	72187048	72187155
ENSOARG00000004905	PUSL1	12	-1	49283888	49286061	pseudouridine synthase like 1 [Source:NCBI gene (formerly Entrezgene);Acc:101105015]
ENSOARG00000004955	PTPRA	13	-1	51465912	51530581	protein tyrosine phosphatase receptor type A [Source:NCBI gene (formerly Entrezgene);Acc:101101909]
ENSOARG00000005049	CP	1	1	237003297	237050085	ceruloplasmin [Source:NCBI gene (formerly Entrezgene);Acc:443053]
ENSOARG00000005063		12	-1	26889752	26890069
ENSOARG00000005065	ACAP3	12	1	49291098	49303940	ArfGAP with coiled-coil, ankyrin repeat and PH domains 3 [Source:NCBI gene (formerly Entrezgene);Acc:101107717]
ENSOARG00000005112	HPS3	1	-1	237051700	237092922	HPS3 biogenesis of lysosomal organelles complex 2 subunit 1 [Source:NCBI gene (formerly Entrezgene);Acc:101122241]
ENSOARG00000005180	HLTF	1	1	237119029	237176583	helicase like transcription factor [Source:NCBI gene (formerly Entrezgene);Acc:101122911]
ENSOARG00000005268	G2E3	18	1	40126773	40201826	G2/M-phase specific E3 ubiquitin protein ligase [Source:NCBI gene (formerly Entrezgene);Acc:101114906]
ENSOARG00000005335	PGD	12	-1	41299271	41313662	phosphogluconate dehydrogenase [Source:NCBI gene (formerly Entrezgene);Acc:443541]
ENSOARG00000005349		24	1	41045872	41066418
ENSOARG00000005448	EFNB2	10	-1	81604311	81650036	ephrin B2 [Source:NCBI gene (formerly Entrezgene);Acc:101115469]
ENSOARG00000005479	ARGLU1	10	-1	81672016	81683510	arginine and glutamate rich 1 [Source:HGNC Symbol;Acc:HGNC:25482]
ENSOARG00000005540	MPHOSPH9	17	1	51928712	51985752	M-phase phosphoprotein 9 [Source:NCBI gene (formerly Entrezgene);Acc:101118475]
ENSOARG00000005578	MGLL	19	1	59534392	59622085	monoglyceride lipase [Source:NCBI gene (formerly Entrezgene);Acc:101114312]
ENSOARG00000005770	KIF1B	12	-1	41337975	41474630	kinesin family member 1B [Source:NCBI gene (formerly Entrezgene);Acc:101115220]
ENSOARG00000005809	ZXDC	19	1	59650183	59675168	ZXD family zinc finger C [Source:NCBI gene (formerly Entrezgene);Acc:101114563]
ENSOARG00000005826	ADAP1	24	1	41514238	41552646	ArfGAP with dual PH domains 1 [Source:HGNC Symbol;Acc:HGNC:16486]
ENSOARG00000005892	GET4	24	-1	41559142	41565165	guided entry of tail-anchored proteins factor 4 [Source:NCBI gene (formerly Entrezgene);Acc:101115424]
ENSOARG00000005947		21	1	49344837	49674757
ENSOARG00000005987	SUN1	24	-1	41569254	41598923	Sad1 and UNC84 domain containing 1 [Source:NCBI gene (formerly Entrezgene);Acc:101115676]
ENSOARG00000006028		19	-1	59651844	59655344
ENSOARG00000006057	DNAAF5	24	-1	41627021	41649086	dynein axonemal assembly factor 5 [Source:HGNC Symbol;Acc:HGNC:26013]
ENSOARG00000006059	BEND7	13	-1	27164866	27245036	BEN domain containing 7 [Source:NCBI gene (formerly Entrezgene);Acc:101115641]
ENSOARG00000006099		9	-1	49938963	49962088
ENSOARG00000006117	SLC41A3	19	-1	59676359	59694771	solute carrier family 41 member 3 [Source:NCBI gene (formerly Entrezgene);Acc:101114819]
ENSOARG00000006153	PDGFA	24	1	41672053	41684100	platelet derived growth factor subunit A [Source:HGNC Symbol;Acc:HGNC:8799]
ENSOARG00000006175	PHOSPHO1	11	1	36883863	36888240	phosphoethanolamine/phosphocholine phosphatase 1 [Source:NCBI gene (formerly Entrezgene);Acc:101112333]
ENSOARG00000006177		21	-1	49403098	49404414
ENSOARG00000006178	FAM20C	24	-1	41797130	41830330	FAM20C golgi associated secretory pathway kinase [Source:HGNC Symbol;Acc:HGNC:22140]
ENSOARG00000006211	ABI3	11	-1	36889767	36898364	ABI family member 3 [Source:HGNC Symbol;Acc:HGNC:29859]
ENSOARG00000006243		13	1	27304914	27363017	pre-mRNA processing factor 18 [Source:NCBI gene (formerly Entrezgene);Acc:101107883]
ENSOARG00000006268		24	-1	41959466	41962192
ENSOARG00000006275	GNGT2	11	1	36901329	36901999	G protein subunit gamma transducin 2 [Source:NCBI gene (formerly Entrezgene);Acc:105608415]
ENSOARG00000006283	PITPNM2	17	1	51986978	52143487	phosphatidylinositol transfer protein membrane associated 2 [Source:NCBI gene (formerly Entrezgene);Acc:101118730]
ENSOARG00000006285	DEAF1	21	1	49408940	49432672	DEAF1 transcription factor [Source:NCBI gene (formerly Entrezgene);Acc:101103106]
ENSOARG00000006293		9	-1	50027769	50046882
ENSOARG00000006320	B4GALNT2	11	-1	36929322	36992982	beta-1,4-N-acetyl-galactosaminyltransferase 2 [Source:NCBI gene (formerly Entrezgene);Acc:101119323]
ENSOARG00000006377	ALDH1L1	19	-1	59698219	59726176	aldehyde dehydrogenase 1 family member L1 [Source:NCBI gene (formerly Entrezgene);Acc:100913154]
ENSOARG00000006428	GLIS1	1	-1	27768357	27866079	GLIS family zinc finger 1 [Source:NCBI gene (formerly Entrezgene);Acc:101117210]
ENSOARG00000006446	CDHR5	21	1	49452515	49460041	cadherin related family member 5 [Source:NCBI gene (formerly Entrezgene);Acc:101103359]
ENSOARG00000006626	IRF7	21	1	49460664	49463554	interferon regulatory factor 7 [Source:NCBI gene (formerly Entrezgene);Acc:101103683]
ENSOARG00000006641		10	-1	7450054	7547626
ENSOARG00000006683		10	-1	8705863	8862855
ENSOARG00000006723	TXNDC11	24	-1	10370778	10422595	thioredoxin domain containing 11 [Source:NCBI gene (formerly Entrezgene);Acc:101108359]
ENSOARG00000006762	ZNF318	20	-1	17007158	17032961	zinc finger protein 318 [Source:NCBI gene (formerly Entrezgene);Acc:101112430]
ENSOARG00000006765	PHRF1	21	-1	49464265	49490468	PHD and ring finger domains 1 [Source:NCBI gene (formerly Entrezgene);Acc:101103608]
ENSOARG00000006808	ZC3H7A	24	-1	10438773	10464644	zinc finger CCCH-type containing 7A [Source:NCBI gene (formerly Entrezgene);Acc:101109932]
ENSOARG00000006936	ABCC10	20	1	17068846	17088589	ATP binding cassette subfamily C member 10 [Source:NCBI gene (formerly Entrezgene);Acc:101112932]
ENSOARG00000006993	RASSF7	21	-1	49499049	49504201	Ras association domain family member 7 [Source:NCBI gene (formerly Entrezgene);Acc:101103935]
ENSOARG00000007058		21	1	49509197	49513504	lamin tail domain containing 2 [Source:NCBI gene (formerly Entrezgene);Acc:101103856]
ENSOARG00000007104	DLK2	20	-1	17088970	17092756	delta like non-canonical Notch ligand 2 [Source:NCBI gene (formerly Entrezgene);Acc:101113181]
ENSOARG00000007208		20	1	17109316	17132112
ENSOARG00000007214		21	-1	49514213	49528697	leucine rich repeat containing 56 [Source:NCBI gene (formerly Entrezgene);Acc:101104106]
ENSOARG00000007356	LRRC73	20	-1	17133482	17135899	leucine rich repeat containing 73 [Source:NCBI gene (formerly Entrezgene);Acc:101113443]
ENSOARG00000007365	HRAS	21	1	49533934	49534746	HRas proto-oncogene, GTPase [Source:NCBI gene (formerly Entrezgene);Acc:101104357]
ENSOARG00000007372	OR51V1	15	1	47619831	47620793	olfactory receptor family 51 subfamily V member 1 [Source:HGNC Symbol;Acc:HGNC:19597]
ENSOARG00000007386		15	1	47632476	47633426	olfactory receptor 52Z1 [Source:NCBI gene (formerly Entrezgene);Acc:101103422]
ENSOARG00000007402		15	1	47678615	47679562	olfactory receptor 52A5-like [Source:NCBI gene (formerly Entrezgene);Acc:101104426]
ENSOARG00000007409		21	1	49565995	49571878
ENSOARG00000007415		15	1	47741790	47742728	olfactory receptor 52A1-like [Source:NCBI gene (formerly Entrezgene);Acc:101105439]
ENSOARG00000007420	YIPF3	20	-1	17136643	17142370	Yip1 domain family member 3 [Source:NCBI gene (formerly Entrezgene);Acc:101114564]
ENSOARG00000007453		21	-1	49578072	49596755
ENSOARG00000007476	SIGIRR	21	1	49579896	49652258	single Ig and TIR domain containing [Source:NCBI gene (formerly Entrezgene);Acc:101104191]
ENSOARG00000007503	POLR1C	20	1	17142681	17150769	RNA polymerase I and III subunit C [Source:NCBI gene (formerly Entrezgene);Acc:101114821]
ENSOARG00000007511	ALDOB	2	1	21476904	21623190	aldolase, fructose-bisphosphate B [Source:NCBI gene (formerly Entrezgene);Acc:443440]
ENSOARG00000007528	ZNF189	2	-1	21635199	21645466	zinc finger protein 189 [Source:NCBI gene (formerly Entrezgene);Acc:101121745]
ENSOARG00000007538	MRPL50	2	1	21645951	21653121	mitochondrial ribosomal protein L50 [Source:NCBI gene (formerly Entrezgene);Acc:101122162]
ENSOARG00000007552		2	1	21711514	21717712	acyl-coenzyme A amino acid N-acyltransferase 2-like [Source:NCBI gene (formerly Entrezgene);Acc:101106409]
ENSOARG00000007570	PLPPR1	2	-1	21730193	21873691	phospholipid phosphatase related 1 [Source:NCBI gene (formerly Entrezgene);Acc:101122409]
ENSOARG00000007580	PLEKHA1	22	1	41165062	41197886	pleckstrin homology domain containing A1 [Source:NCBI gene (formerly Entrezgene);Acc:101110806]
ENSOARG00000007651	ANO9	21	1	49626481	49642497	anoctamin 9 [Source:NCBI gene (formerly Entrezgene);Acc:101105118]
ENSOARG00000007701	RALGAPA1	18	-1	44679806	44872422	Ral GTPase activating protein catalytic subunit alpha 1 [Source:NCBI gene (formerly Entrezgene);Acc:101120113]
ENSOARG00000007728	NEMP1	3	1	162248254	162264573	nuclear envelope integral membrane protein 1 [Source:HGNC Symbol;Acc:HGNC:29001]
ENSOARG00000007739		6	1	71814812	71815222
ENSOARG00000007766	MYO1A	3	1	162272603	162301977	myosin IA [Source:NCBI gene (formerly Entrezgene);Acc:101102890]
ENSOARG00000007785	HTRA1	22	1	41254510	41282240	HtrA serine peptidase 1 [Source:NCBI gene (formerly Entrezgene);Acc:101101854]
ENSOARG00000007813	TRMT11	8	-1	12289261	12403664	tRNA methyltransferase 11 homolog [Source:NCBI gene (formerly Entrezgene);Acc:101117511]
ENSOARG00000007835		13	-1	52973098	52986171	protein-L-isoaspartate (D-aspartate) O-methyltransferase domain containing 2 [Source:NCBI gene (formerly Entrezgene);Acc:101106449]
ENSOARG00000007878	NCOA7	8	-1	12446609	12579375	nuclear receptor coactivator 7 [Source:NCBI gene (formerly Entrezgene);Acc:101117768]
ENSOARG00000007888	PKP3	21	-1	49653790	49658605	plakophilin 3 [Source:NCBI gene (formerly Entrezgene);Acc:101105372]
ENSOARG00000007920		3	1	162302984	162306603	tachykinin precursor 3 [Source:NCBI gene (formerly Entrezgene);Acc:443213]
ENSOARG00000007930		18	-1	45103354	45200543
ENSOARG00000007933	GPR182	3	-1	162332858	162334944	G protein-coupled receptor 182 [Source:HGNC Symbol;Acc:HGNC:13708]
ENSOARG00000007966	MYT1	13	-1	53005310	53040574	myelin transcription factor 1 [Source:NCBI gene (formerly Entrezgene);Acc:101106866]
ENSOARG00000008005		9	-1	25522386	25524030
ENSOARG00000008021	NKX2-1	18	-1	45584996	45587777	NK2 homeobox 1 [Source:NCBI gene (formerly Entrezgene);Acc:101121204]
ENSOARG00000008028		3	-1	162341281	162341833
ENSOARG00000008033	B4GALNT4	21	-1	49672547	49680911	beta-1,4-N-acetyl-galactosaminyltransferase 4 [Source:NCBI gene (formerly Entrezgene);Acc:101105615]
ENSOARG00000008064	LEF1	6	1	17197574	17304587	lymphoid enhancer binding factor 1 [Source:NCBI gene (formerly Entrezgene);Acc:780521]
ENSOARG00000008098	GDI2	13	1	42036764	42067988	GDP dissociation inhibitor 2 [Source:NCBI gene (formerly Entrezgene);Acc:100302068]
ENSOARG00000008115		21	1	49743059	49748737
ENSOARG00000008141	OPRL1	13	-1	53103292	53110212	opioid related nociceptin receptor 1 [Source:NCBI gene (formerly Entrezgene);Acc:101107542]
ENSOARG00000008178		21	-1	49751580	49752838	interferon-induced transmembrane protein 3 [Source:NCBI gene (formerly Entrezgene);Acc:101104700]
ENSOARG00000008198	AGMO	4	-1	23650918	24047746	alkylglycerol monooxygenase [Source:NCBI gene (formerly Entrezgene);Acc:101103313]
ENSOARG00000008211		21	1	49772316	49772709
ENSOARG00000008219		13	1	53116467	53116906
ENSOARG00000008229	IFITM5	21	1	49789518	49792831	interferon induced transmembrane protein 5 [Source:HGNC Symbol;Acc:HGNC:16644]
ENSOARG00000008258	RGS19	13	1	53120747	53126165	regulator of G protein signaling 19 [Source:NCBI gene (formerly Entrezgene);Acc:101107810]
ENSOARG00000008366	TASOR2	13	-1	42071289	42132488	transcription activation suppressor family member 2 [Source:NCBI gene (formerly Entrezgene);Acc:101107038]
ENSOARG00000008384	PGGHG	21	-1	49795958	49801217	protein-glucosylgalactosylhydroxylysine glucosidase [Source:NCBI gene (formerly Entrezgene);Acc:101106382]
ENSOARG00000008436	TCEA2	13	-1	53127594	53132128	transcription elongation factor A2 [Source:NCBI gene (formerly Entrezgene);Acc:101115815]
ENSOARG00000008482		4	-1	68891380	68891541
ENSOARG00000008540	ACOX1	11	1	54681819	54705928	acyl-CoA oxidase 1 [Source:NCBI gene (formerly Entrezgene);Acc:101118626]
ENSOARG00000008544		21	-1	49804162	49809184	NLR family pyrin domain containing 6 [Source:NCBI gene (formerly Entrezgene);Acc:101106640]
ENSOARG00000008595	MARF1	24	-1	14014964	14048160	meiosis regulator and mRNA stability factor 1 [Source:NCBI gene (formerly Entrezgene);Acc:101110728]
ENSOARG00000008601		21	1	49823577	49824875
ENSOARG00000008606		6	1	116941056	116941379
ENSOARG00000008634		2	-1	31239795	31476634
ENSOARG00000008661	CFAP100	19	1	60433765	60459330	cilia and flagella associated protein 100 [Source:NCBI gene (formerly Entrezgene);Acc:101117883]
ENSOARG00000008674	PSMD13	21	-1	49825746	49838611	proteasome 26S subunit, non-ATPase 13 [Source:NCBI gene (formerly Entrezgene);Acc:101104945]
ENSOARG00000008707	TICAM1	5	1	16922626	16924761	toll like receptor adaptor molecule 1 [Source:NCBI gene (formerly Entrezgene);Acc:101111016]
ENSOARG00000008713	FBF1	11	1	54707903	54727245	Fas binding factor 1 [Source:NCBI gene (formerly Entrezgene);Acc:101118886]
ENSOARG00000008714		24	-1	14025822	14026147
ENSOARG00000008715	MTSS1	9	1	28261745	28421317	MTSS I-BAR domain containing 1 [Source:NCBI gene (formerly Entrezgene);Acc:101105577]
ENSOARG00000008719	NDE1	24	1	14066790	14092258	nudE neurodevelopment protein 1 [Source:NCBI gene (formerly Entrezgene);Acc:101114156]
ENSOARG00000008776	PRPF6	13	-1	53158419	53193599	pre-mRNA processing factor 6 [Source:NCBI gene (formerly Entrezgene);Acc:101108070]
ENSOARG00000008825	NDUFB9	9	-1	28424418	28431883	NADH:ubiquinone oxidoreductase subunit B9 [Source:NCBI gene (formerly Entrezgene);Acc:101106179]
ENSOARG00000008832	SIRT3	21	1	49839476	49868243	sirtuin 3 [Source:NCBI gene (formerly Entrezgene);Acc:101105454]
ENSOARG00000008878	CD84	1	-1	109915742	109941231	CD84 molecule [Source:NCBI gene (formerly Entrezgene);Acc:101102779]
ENSOARG00000008892	MRPL38	11	1	54733432	54740870	mitochondrial ribosomal protein L38 [Source:NCBI gene (formerly Entrezgene);Acc:101107615]
ENSOARG00000008893	SLAMF1	1	-1	110036489	110075450	signaling lymphocytic activation molecule family member 1 [Source:NCBI gene (formerly Entrezgene);Acc:678672]
ENSOARG00000008916	TATDN1	9	1	28431947	28462592	TatD DNase domain containing 1 [Source:NCBI gene (formerly Entrezgene);Acc:101106439]
ENSOARG00000008941	TRIM65	11	1	54739292	54744668	tripartite motif containing 65 [Source:NCBI gene (formerly Entrezgene);Acc:101107878]
ENSOARG00000008975	MYH11	24	-1	14094951	14204211	myosin heavy chain 11 [Source:NCBI gene (formerly Entrezgene);Acc:101114409]
ENSOARG00000009022		13	1	53197126	53201984
ENSOARG00000009072	RNF139	9	-1	28463518	28485500	ring finger protein 139 [Source:HGNC Symbol;Acc:HGNC:17023]
ENSOARG00000009079		11	1	54751819	54753637
ENSOARG00000009144	JAZF1	4	1	68145685	68296923	JAZF zinc finger 1 [Source:NCBI gene (formerly Entrezgene);Acc:101113233]
ENSOARG00000009182	TAX1BP1	4	-1	68296396	68382686	Tax1 binding protein 1 [Source:NCBI gene (formerly Entrezgene);Acc:101103972]
ENSOARG00000009183	WBP2	11	1	54768794	54774792	WW domain binding protein 2 [Source:NCBI gene (formerly Entrezgene);Acc:101108404]
ENSOARG00000009259	ZNF512B	13	1	53204035	53209577	zinc finger protein 512B [Source:NCBI gene (formerly Entrezgene);Acc:101108330]
ENSOARG00000009300		4	1	68458680	68569895	3-hydroxyisobutyrate dehydrogenase [Source:NCBI gene (formerly Entrezgene);Acc:101113492]
ENSOARG00000009325	UNC13D	11	1	54777291	54791527	unc-13 homolog D [Source:NCBI gene (formerly Entrezgene);Acc:101119148]
ENSOARG00000009349	KNTC1	17	-1	52444862	52510658	kinetochore associated 1 [Source:NCBI gene (formerly Entrezgene);Acc:101120018]
ENSOARG00000009439	EVX1	4	-1	68787397	68791217	even-skipped homeobox 1 [Source:NCBI gene (formerly Entrezgene);Acc:101113753]
ENSOARG00000009477		4	-1	68826877	68846770
ENSOARG00000009543	UCKL1	13	1	53218913	53226893	uridine-cytidine kinase 1 like 1 [Source:NCBI gene (formerly Entrezgene);Acc:101116335]
ENSOARG00000009548	UNK	11	-1	54791473	54825189	unk zinc finger [Source:NCBI gene (formerly Entrezgene);Acc:101119407]
ENSOARG00000009550		4	1	68833603	68834652
ENSOARG00000009551	FYB1	16	1	35170143	35269324	FYN binding protein 1 [Source:NCBI gene (formerly Entrezgene);Acc:101105278]
ENSOARG00000009555	H3-3B	11	1	54829754	54830376	histone H3.3 [Source:NCBI gene (formerly Entrezgene);Acc:101108931]
ENSOARG00000009600	GALK1	11	1	54840907	54847564	galactokinase 1 [Source:NCBI gene (formerly Entrezgene);Acc:101119657]
ENSOARG00000009641	HDAC9	4	1	27257256	27548397	histone deacetylase 9 [Source:HGNC Symbol;Acc:HGNC:14065]
ENSOARG00000009675	HOXA10	4	1	68858042	68863494	homeobox A10 [Source:NCBI gene (formerly Entrezgene);Acc:101105239]
ENSOARG00000009680		4	1	68867787	68869662	homeobox A9 [Source:NCBI gene (formerly Entrezgene);Acc:101105652]
ENSOARG00000009682	RICTOR	16	1	35296464	35415823	RPTOR independent companion of MTOR complex 2 [Source:NCBI gene (formerly Entrezgene);Acc:101105528]
ENSOARG00000009688		12	1	42897047	43151892	arginine-glutamic acid dipeptide repeats [Source:NCBI gene (formerly Entrezgene);Acc:101114630]
ENSOARG00000009713	DNAJC5	13	-1	53233501	53235599	DnaJ heat shock protein family (Hsp40) member C5 [Source:NCBI gene (formerly Entrezgene);Acc:101108591]
ENSOARG00000009717		4	1	68876468	68891655
ENSOARG00000009758	HOXA6	4	1	68885113	68890705	homeobox A6 [Source:NCBI gene (formerly Entrezgene);Acc:114108616]
ENSOARG00000009764	ITGB4	11	-1	54848050	54874496	integrin subunit beta 4 [Source:NCBI gene (formerly Entrezgene);Acc:101119919]
ENSOARG00000009777	TPD52L2	13	-1	53264089	53276216	TPD52 like 2 [Source:NCBI gene (formerly Entrezgene);Acc:101116591]
ENSOARG00000009789		4	1	68903112	68904155	homeobox A4 [Source:NCBI gene (formerly Entrezgene);Acc:101114773]
ENSOARG00000009797	HOXA3	4	1	68921977	68924549	homeobox A3 [Source:NCBI gene (formerly Entrezgene);Acc:101115026]
ENSOARG00000009838	SLC16A11	11	-1	26450939	26453354	solute carrier family 16 member 11 [Source:HGNC Symbol;Acc:HGNC:23093]
ENSOARG00000009842	HOXA2	4	1	68930059	68931782	homeobox A2 [Source:NCBI gene (formerly Entrezgene);Acc:101106161]
ENSOARG00000009850	HOXA1	4	1	68936434	68937869	homeobox A1 [Source:HGNC Symbol;Acc:HGNC:5099]
ENSOARG00000009867	CLEC10A	11	-1	26457911	26460684	C-type lectin domain family 10 member A [Source:NCBI gene (formerly Entrezgene);Acc:101117600]
ENSOARG00000009892	ABHD16B	13	-1	53280623	53282184	abhydrolase domain containing 16B [Source:NCBI gene (formerly Entrezgene);Acc:101116851]
ENSOARG00000009948	ZBTB46	13	1	53322168	53348123	zinc finger and BTB domain containing 46 [Source:HGNC Symbol;Acc:HGNC:16094]
ENSOARG00000009957	CREB3L2	4	-1	101365854	101490099	cAMP responsive element binding protein 3 like 2 [Source:NCBI gene (formerly Entrezgene);Acc:101108743]
ENSOARG00000010000	ASGR2	11	-1	26480695	26491111	asialoglycoprotein receptor 2 [Source:NCBI gene (formerly Entrezgene);Acc:101115381]
ENSOARG00000010045	AKR1D1	4	1	101544228	101598085	aldo-keto reductase family 1 member D1 [Source:NCBI gene (formerly Entrezgene);Acc:101103641]
ENSOARG00000010108	FEZ2	3	1	87367744	87410792	fasciculation and elongation protein zeta 2 [Source:NCBI gene (formerly Entrezgene);Acc:101121927]
ENSOARG00000010127	CRIM1	3	-1	87413330	87622128	cysteine rich transmembrane BMP regulator 1 [Source:NCBI gene (formerly Entrezgene);Acc:101122183]
ENSOARG00000010128	ZGPAT	13	-1	53357610	53366731	zinc finger CCCH-type and G-patch domain containing [Source:NCBI gene (formerly Entrezgene);Acc:100302028]
ENSOARG00000010137	ASGR1	11	-1	26522788	26529770	asialoglycoprotein receptor 1 [Source:NCBI gene (formerly Entrezgene);Acc:101116157]
ENSOARG00000010188	ARFRP1	13	1	53366104	53373064	ADP ribosylation factor related protein 1 [Source:NCBI gene (formerly Entrezgene);Acc:100302308]
ENSOARG00000010274		1	1	54398609	54399538	developmental pluripotency-associated protein 4 pseudogene [Source:NCBI gene (formerly Entrezgene);Acc:101103103]
ENSOARG00000010322	TNFRSF6B	13	-1	53374809	53375949	TNF receptor superfamily member 6b [Source:NCBI gene (formerly Entrezgene);Acc:101117352]
ENSOARG00000010368		13	-1	53376624	53396760	regulator of telomere elongation helicase 1 [Source:NCBI gene (formerly Entrezgene);Acc:101117606]
ENSOARG00000010397	DLG4	11	-1	26540750	26562824	discs large MAGUK scaffold protein 4 [Source:NCBI gene (formerly Entrezgene);Acc:101116743]
ENSOARG00000010418	ATF6	1	1	111240152	111462621	activating transcription factor 6 [Source:NCBI gene (formerly Entrezgene);Acc:541606]
ENSOARG00000010430	PPA2	6	1	19864955	19945670	inorganic pyrophosphatase 2 [Source:NCBI gene (formerly Entrezgene);Acc:101104749]
ENSOARG00000010481		5	1	107311852	107312010
ENSOARG00000010555	STMN3	13	1	53404729	53413032	stathmin 3 [Source:NCBI gene (formerly Entrezgene);Acc:101108850]
ENSOARG00000010564	RSRC2	17	1	52513143	52528368	arginine and serine rich coiled-coil 2 [Source:NCBI gene (formerly Entrezgene);Acc:101120274]
ENSOARG00000010596	GMEB2	13	1	53427388	53437810	glucocorticoid modulatory element binding protein 2 [Source:NCBI gene (formerly Entrezgene);Acc:101117866]
ENSOARG00000010626	GRB2	11	1	55133625	55188875	growth factor receptor bound protein 2 [Source:NCBI gene (formerly Entrezgene);Acc:101109893]
ENSOARG00000010661		13	1	42669234	42688289
ENSOARG00000010662	ACADVL	11	1	26561092	26570595	acyl-CoA dehydrogenase very long chain [Source:NCBI gene (formerly Entrezgene);Acc:101117173]
ENSOARG00000010679	SLC25A19	11	1	55213585	55223216	solute carrier family 25 member 19 [Source:NCBI gene (formerly Entrezgene);Acc:100217405]
ENSOARG00000010684	SNN	24	1	10368431	10368694	stannin [Source:NCBI gene (formerly Entrezgene);Acc:101109666]
ENSOARG00000010686	FNDC11	13	-1	53442766	53445430	fibronectin type III domain containing 11 [Source:HGNC Symbol;Acc:HGNC:28764]
ENSOARG00000010728	ZCCHC8	17	1	52534834	52555241	zinc finger CCHC-type containing 8 [Source:NCBI gene (formerly Entrezgene);Acc:101120863]
ENSOARG00000010740	ZRANB1	22	1	43382432	43423267	zinc finger RANBP2-type containing 1 [Source:NCBI gene (formerly Entrezgene);Acc:101114991]
ENSOARG00000010780	SRMS	13	1	53446523	53452415	src-related kinase lacking C-terminal regulatory tyrosine and N-terminal myristylation sites [Source:NCBI gene (formerly Entrezgene);Acc:101118124]
ENSOARG00000010793	MIF4GD	11	1	55225390	55229266	MIF4G domain containing [Source:HGNC Symbol;Acc:HGNC:24030]
ENSOARG00000010809	DVL2	11	-1	26570022	26578463	dishevelled segment polarity protein 2 [Source:NCBI gene (formerly Entrezgene);Acc:101117599]
ENSOARG00000010858		24	1	35467228	35467917
ENSOARG00000010865	MRPS7	11	-1	55229995	55232835	mitochondrial ribosomal protein S7 [Source:NCBI gene (formerly Entrezgene);Acc:101110157]
ENSOARG00000010905	RCC1L	24	-1	32581660	32607844	RCC1 like [Source:NCBI gene (formerly Entrezgene);Acc:101112531]
ENSOARG00000010907		13	1	42692124	42711362	dihydrodiol dehydrogenase 3-like [Source:NCBI gene (formerly Entrezgene);Acc:106990122]
ENSOARG00000010913	GGA3	11	1	55233087	55245465	golgi associated, gamma adaptin ear containing, ARF binding protein 3 [Source:NCBI gene (formerly Entrezgene);Acc:101110428]
ENSOARG00000010918		22	-1	43427642	43542616	C-terminal binding protein 2 [Source:NCBI gene (formerly Entrezgene);Acc:101115416]
ENSOARG00000010950	PTK6	13	1	53455206	53461499	protein tyrosine kinase 6 [Source:NCBI gene (formerly Entrezgene);Acc:101109378]
ENSOARG00000010976		24	1	32635145	32670848	general transcription factor II-I repeat domain-containing protein 2 [Source:NCBI gene (formerly Entrezgene);Acc:101112784]
ENSOARG00000010982	PHF23	11	-1	26579800	26583536	PHD finger protein 23 [Source:NCBI gene (formerly Entrezgene);Acc:101118033]
ENSOARG00000010987	NUP85	11	-1	55247760	55273455	nucleoporin 85 [Source:NCBI gene (formerly Entrezgene);Acc:101110856]
ENSOARG00000010995		13	1	53465401	53465913
ENSOARG00000011016	GABARAP	11	-1	26584745	26586216	GABA type A receptor-associated protein [Source:NCBI gene (formerly Entrezgene);Acc:101118285]
ENSOARG00000011046	NCF1	24	-1	32675507	32685763	neutrophil cytosolic factor 1 [Source:NCBI gene (formerly Entrezgene);Acc:780489]
ENSOARG00000011052	EEF1A2	13	1	53482080	53488365	eukaryotic translation elongation factor 1 alpha 2 [Source:NCBI gene (formerly Entrezgene);Acc:101109898]
ENSOARG00000011087		13	1	42736074	42747597	dihydrodiol dehydrogenase 3 [Source:NCBI gene (formerly Entrezgene);Acc:101109111]
ENSOARG00000011097		18	-1	19203686	19204762
ENSOARG00000011107	KCNQ2	13	1	53515533	53543235	potassium voltage-gated channel subfamily Q member 2 [Source:NCBI gene (formerly Entrezgene);Acc:101118630]
ENSOARG00000011119		18	1	19323674	19324746
ENSOARG00000011121	CTDNEP1	11	-1	26587971	26593666	CTD nuclear envelope phosphatase 1 [Source:NCBI gene (formerly Entrezgene);Acc:101118539]
ENSOARG00000011123		11	1	55286750	55294990
ENSOARG00000011195	CHRNA4	13	1	53570788	53580288	cholinergic receptor nicotinic alpha 4 subunit [Source:NCBI gene (formerly Entrezgene);Acc:101118889]
ENSOARG00000011218	SARNP	3	1	163373110	163420988	SAP domain containing ribonucleoprotein [Source:NCBI gene (formerly Entrezgene);Acc:101114432]
ENSOARG00000011231	GDF11	3	-1	163428386	163435878	growth differentiation factor 11 [Source:HGNC Symbol;Acc:HGNC:4216]
ENSOARG00000011240	ELP5	11	1	26594896	26600422	elongator acetyltransferase complex subunit 5 [Source:NCBI gene (formerly Entrezgene);Acc:101117858]
ENSOARG00000011244	RDH5	3	-1	163451439	163458012	retinol dehydrogenase 5 [Source:NCBI gene (formerly Entrezgene);Acc:101115199]
ENSOARG00000011265		13	-1	53585291	53594010
ENSOARG00000011276		24	-1	32699946	32762145	general transcription factor IIi [Source:NCBI gene (formerly Entrezgene);Acc:101113297]
ENSOARG00000011303	MAPT	11	1	45315251	45433964	microtubule associated protein tau [Source:NCBI gene (formerly Entrezgene);Acc:101121024]
ENSOARG00000011311	CLDN7	11	-1	26601004	26602523	claudin 7 [Source:NCBI gene (formerly Entrezgene);Acc:100462658]
ENSOARG00000011313		3	1	163451556	163453058	CD63 molecule [Source:NCBI gene (formerly Entrezgene);Acc:101114944]
ENSOARG00000011326	BLOC1S1	3	-1	163459367	163462868	biogenesis of lysosomal organelles complex 1 subunit 1 [Source:NCBI gene (formerly Entrezgene);Acc:101105150]
ENSOARG00000011371	ATXN7	19	-1	37490667	37581002	ataxin 7 [Source:NCBI gene (formerly Entrezgene);Acc:101106632]
ENSOARG00000011396	THOC7	19	1	37636818	37642160	THO complex 7 [Source:NCBI gene (formerly Entrezgene);Acc:101106888]
ENSOARG00000011406	ARFGAP1	13	-1	53597334	53607032	ADP ribosylation factor GTPase activating protein 1 [Source:NCBI gene (formerly Entrezgene);Acc:101110163]
ENSOARG00000011427	ITGA7	3	1	163469104	163492706	integrin subunit alpha 7 [Source:NCBI gene (formerly Entrezgene);Acc:101115445]
ENSOARG00000011438	KANSL1	11	-1	45440771	45606179	KAT8 regulatory NSL complex subunit 1 [Source:NCBI gene (formerly Entrezgene);Acc:101121022]
ENSOARG00000011439	C3orf49	19	-1	37643415	37654899	chromosome 3 open reading frame 49 [Source:HGNC Symbol;Acc:HGNC:25190]
ENSOARG00000011448	SLC2A4	11	1	26615572	26620086	solute carrier family 2 member 4 [Source:NCBI gene (formerly Entrezgene);Acc:101118797]
ENSOARG00000011490		13	1	42782645	42805742	dihydrodiol dehydrogenase 3-like [Source:NCBI gene (formerly Entrezgene);Acc:101109377]
ENSOARG00000011497		13	1	53612803	53619974
ENSOARG00000011505	METTL7B	3	-1	163493291	163495349	methyltransferase like 7B [Source:NCBI gene (formerly Entrezgene);Acc:101115696]
ENSOARG00000011555		13	1	53619140	53734463
ENSOARG00000011562	YBX2	11	-1	26622054	26629148	Y-box binding protein 2 [Source:NCBI gene (formerly Entrezgene);Acc:101118116]
ENSOARG00000011588	BIRC7	13	-1	53628614	53631907	baculoviral IAP repeat containing 7 [Source:NCBI gene (formerly Entrezgene);Acc:101110435]
ENSOARG00000011614		17	1	44541875	44552331
ENSOARG00000011616		10	1	29275771	29457586	elongation factor 1-alpha 1 [Source:NCBI gene (formerly Entrezgene);Acc:101110773]
ENSOARG00000011622	C1orf158	12	-1	52750937	52776030	chromosome 1 open reading frame 158 [Source:HGNC Symbol;Acc:HGNC:28567]
ENSOARG00000011639	YTHDF1	13	1	53642209	53653279	YTH N6-methyladenosine RNA binding protein 1 [Source:HGNC Symbol;Acc:HGNC:15867]
ENSOARG00000011653	RXFP2	10	-1	29454677	29502617	relaxin family peptide receptor 2 [Source:NCBI gene (formerly Entrezgene);Acc:101111032]
ENSOARG00000011688	NOC4L	17	-1	44600540	44605161	nucleolar complex associated 4 homolog [Source:NCBI gene (formerly Entrezgene);Acc:101112347]
ENSOARG00000011716	DDB1	21	-1	39083210	39251073	damage specific DNA binding protein 1 [Source:NCBI gene (formerly Entrezgene);Acc:101106122]
ENSOARG00000011723	AADACL3	12	-1	52797580	52808130	arylacetamide deacetylase like 3 [Source:NCBI gene (formerly Entrezgene);Acc:101112496]
ENSOARG00000011796	GPS2	11	-1	26646285	26653048	G protein pathway suppressor 2 [Source:NCBI gene (formerly Entrezgene);Acc:101119059]
ENSOARG00000011942	DDX51	17	1	44605200	44610708	DEAD-box helicase 51 [Source:NCBI gene (formerly Entrezgene);Acc:101112597]
ENSOARG00000012043		21	1	39086655	39182575	pepsin A [Source:NCBI gene (formerly Entrezgene);Acc:101105864]
ENSOARG00000012099		17	-1	44617345	44618317
ENSOARG00000012180	FLT1	10	1	31837779	32031907	fms related receptor tyrosine kinase 1 [Source:NCBI gene (formerly Entrezgene);Acc:443088]
ENSOARG00000012186	CATSPERB	18	-1	55237753	55371780	cation channel sperm associated auxiliary subunit beta [Source:NCBI gene (formerly Entrezgene);Acc:101112425]
ENSOARG00000012362	TC2N	18	-1	55433459	55463396	tandem C2 domains, nuclear [Source:NCBI gene (formerly Entrezgene);Acc:101112679]
ENSOARG00000012425	DCAF6	1	1	118216685	118399629	DDB1 and CUL4 associated factor 6 [Source:NCBI gene (formerly Entrezgene);Acc:101116363]
ENSOARG00000012480	EP400	17	-1	44630581	44714060	E1A binding protein p400 [Source:NCBI gene (formerly Entrezgene);Acc:101117449]
ENSOARG00000012485	VWCE	21	-1	39191066	39215308	von Willebrand factor C and EGF domains [Source:NCBI gene (formerly Entrezgene);Acc:101109135]
ENSOARG00000012502	GPR161	1	-1	118410302	118432966	G protein-coupled receptor 161 [Source:NCBI gene (formerly Entrezgene);Acc:101117126]
ENSOARG00000012529	CENPL	12	-1	53214186	53224480	centromere protein L [Source:NCBI gene (formerly Entrezgene);Acc:101113689]
ENSOARG00000012587	LHX8	1	1	50923426	50952291	LIM homeobox 8 [Source:NCBI gene (formerly Entrezgene);Acc:101107567]
ENSOARG00000012612	SLC44A5	1	-1	51010869	51201573	solute carrier family 44 member 5 [Source:NCBI gene (formerly Entrezgene);Acc:101107837]
ENSOARG00000012642	DARS2	12	1	53234218	53260645	aspartyl-tRNA synthetase 2, mitochondrial [Source:NCBI gene (formerly Entrezgene);Acc:101114203]
ENSOARG00000012675	TKFC	21	1	39254813	39262982	triokinase and FMN cyclase [Source:NCBI gene (formerly Entrezgene);Acc:101106378]
ENSOARG00000012688	ATP8B3	5	-1	41517974	41538482	ATPase phospholipid transporting 8B3 [Source:NCBI gene (formerly Entrezgene);Acc:101116987]
ENSOARG00000012812	CYB561A3	21	-1	39266183	39271078	cytochrome b ascorbate-dependent protein 3 [Source:NCBI gene (formerly Entrezgene);Acc:101106637]
ENSOARG00000012816	ZBTB37	12	1	53268626	53280142	zinc finger and BTB domain containing 37 [Source:NCBI gene (formerly Entrezgene);Acc:101114454]
ENSOARG00000012843	TMEM138	21	1	39276670	39280235	transmembrane protein 138 [Source:NCBI gene (formerly Entrezgene);Acc:101106893]
ENSOARG00000012844	REXO1	5	-1	41543791	41561549	RNA exonuclease 1 homolog [Source:NCBI gene (formerly Entrezgene);Acc:101117249]
ENSOARG00000012873	TMEM216	21	1	39294703	39298445	transmembrane protein 216 [Source:NCBI gene (formerly Entrezgene);Acc:101107146]
ENSOARG00000012924	ABHD17A	5	-1	41586262	41591143	abhydrolase domain containing 17A, depalmitoylase [Source:HGNC Symbol;Acc:HGNC:28756]
ENSOARG00000012929	SERPINC1	12	-1	53297207	53307981	serpin family C member 1 [Source:NCBI gene (formerly Entrezgene);Acc:443407]
ENSOARG00000012981	SCAMP4	5	1	41615476	41629823	secretory carrier membrane protein 4 [Source:NCBI gene (formerly Entrezgene);Acc:101119982]
ENSOARG00000013036	CSNK1G2	5	1	41637563	41660237	casein kinase 1 gamma 2 [Source:NCBI gene (formerly Entrezgene);Acc:101120239]
ENSOARG00000013118	ACADS	17	1	62600483	62620320	acyl-CoA dehydrogenase short chain [Source:NCBI gene (formerly Entrezgene);Acc:101119850]
ENSOARG00000013186	SYNCRIP	8	1	50951629	50974118	synaptotagmin binding cytoplasmic RNA interacting protein [Source:NCBI gene (formerly Entrezgene);Acc:101115037]
ENSOARG00000013234	SNX14	8	1	50976002	51065625	sorting nexin 14 [Source:NCBI gene (formerly Entrezgene);Acc:101116152]
ENSOARG00000013244	SPPL3	17	-1	62657585	62693241	signal peptide peptidase like 3 [Source:NCBI gene (formerly Entrezgene);Acc:101120111]
ENSOARG00000013361	RFX3	2	-1	71003150	71324756	regulatory factor X3 [Source:NCBI gene (formerly Entrezgene);Acc:101111519]
ENSOARG00000013402	PTGFR	1	1	54317525	54375864	prostaglandin F receptor [Source:NCBI gene (formerly Entrezgene);Acc:443366]
ENSOARG00000013409		1	-1	54381880	54382546
ENSOARG00000013421	IFI44L	1	1	54450661	54466479	interferon induced protein 44 like [Source:NCBI gene (formerly Entrezgene);Acc:101103357]
ENSOARG00000013431	LYG2	3	1	102017416	102024159	lysozyme g2 [Source:NCBI gene (formerly Entrezgene);Acc:101106835]
ENSOARG00000013440	IFI44	1	1	54477133	54495155	interferon induced protein 44 [Source:NCBI gene (formerly Entrezgene);Acc:101110473]
ENSOARG00000013442		3	-1	102040573	102048145	mitochondrial ribosomal protein L30 [Source:NCBI gene (formerly Entrezgene);Acc:101107082]
ENSOARG00000013452	MITD1	3	1	102055498	102072664	microtubule interacting and trafficking domain containing 1 [Source:NCBI gene (formerly Entrezgene);Acc:101107510]
ENSOARG00000013466	TSGA10	3	1	102117600	102187333	testis specific 10 [Source:NCBI gene (formerly Entrezgene);Acc:101108208]
ENSOARG00000013750	CDC42EP1	3	1	213415137	213421643	CDC42 effector protein 1 [Source:NCBI gene (formerly Entrezgene);Acc:101122773]
ENSOARG00000013761	LGALS2	3	-1	213422852	213424741	galectin 2 [Source:NCBI gene (formerly Entrezgene);Acc:101118867]
ENSOARG00000013832	ABCB4	4	1	32939153	32982289	ATP binding cassette subfamily B member 4 [Source:NCBI gene (formerly Entrezgene);Acc:101122517]
ENSOARG00000013836	GGA1	3	1	213445479	213463517	golgi associated, gamma adaptin ear containing, ARF binding protein 1 [Source:NCBI gene (formerly Entrezgene);Acc:101123025]
ENSOARG00000013866	KANSL3	3	1	103774001	103813253	KAT8 regulatory NSL complex subunit 3 [Source:NCBI gene (formerly Entrezgene);Acc:101111870]
ENSOARG00000013883	ARID5A	3	-1	103828090	103832824	AT-rich interaction domain 5A [Source:NCBI gene (formerly Entrezgene);Acc:101114695]
ENSOARG00000013887	NFIB	2	-1	82133740	82388297	nuclear factor I B [Source:NCBI gene (formerly Entrezgene);Acc:100913158]
ENSOARG00000013905		6	-1	24764224	24769326	sel1-repeat-containing protein YbeT-like [Source:NCBI gene (formerly Entrezgene);Acc:106990491]
ENSOARG00000013931		3	1	213470349	213482755	SH3 domain binding protein 1 [Source:NCBI gene (formerly Entrezgene);Acc:101123285]
ENSOARG00000013939	GLB1L3	15	1	80595688	80628412	galactosidase beta 1 like 3 [Source:NCBI gene (formerly Entrezgene);Acc:101115988]
ENSOARG00000013947	PDXP	3	1	213485200	213489855	pyridoxal phosphatase [Source:NCBI gene (formerly Entrezgene);Acc:101123544]
ENSOARG00000013955	H2AZ1	6	1	24826878	24828144	histone H2A.Z [Source:NCBI gene (formerly Entrezgene);Acc:443235]
ENSOARG00000014026	CROT	4	-1	32985882	33035073	carnitine O-octanoyltransferase [Source:NCBI gene (formerly Entrezgene);Acc:101111626]
ENSOARG00000014034	DNAJB14	6	1	24829721	24873057	DnaJ heat shock protein family (Hsp40) member B14 [Source:NCBI gene (formerly Entrezgene);Acc:101109970]
ENSOARG00000014092	LAMTOR3	6	1	24882730	24889832	late endosomal/lysosomal adaptor, MAPK and MTOR activator 3 [Source:NCBI gene (formerly Entrezgene);Acc:101110413]
ENSOARG00000014096	TM6SF1	18	1	22597463	22620825	transmembrane 6 superfamily member 1 [Source:NCBI gene (formerly Entrezgene);Acc:101111579]
ENSOARG00000014131	HDGFL3	18	-1	22635224	22647248	HDGF like 3 [Source:HGNC Symbol;Acc:HGNC:24937]
ENSOARG00000014185	BNC1	18	-1	22758417	22784473	basonuclin 1 [Source:NCBI gene (formerly Entrezgene);Acc:101107140]
ENSOARG00000014209	DAPP1	6	-1	24892320	24950969	dual adaptor of phosphotyrosine and 3-phosphoinositides 1 [Source:NCBI gene (formerly Entrezgene);Acc:101110675]
ENSOARG00000014284	GLB1L2	15	1	80646031	80674032	beta-galactosidase-1-like protein 2 [Source:NCBI gene (formerly Entrezgene);Acc:101116255]
ENSOARG00000014329		3	1	104836202	105202681	acyl-CoA oxidase like [Source:NCBI gene (formerly Entrezgene);Acc:101118010]
ENSOARG00000014342	BCL2L11	3	1	105205578	105251184	BCL2 like 11 [Source:NCBI gene (formerly Entrezgene);Acc:100505402]
ENSOARG00000014376	B3GAT1	15	-1	80680144	80685814	beta-1,3-glucuronyltransferase 1 [Source:HGNC Symbol;Acc:HGNC:921]
ENSOARG00000014452	EFL1	18	1	23449032	23559583	elongation factor like GTPase 1 [Source:NCBI gene (formerly Entrezgene);Acc:101112350]
ENSOARG00000014466	TMEM68	9	-1	35872356	35895899	transmembrane protein 68 [Source:NCBI gene (formerly Entrezgene);Acc:101114876]
ENSOARG00000014481	PRKRIP1	24	-1	34532533	34555843	PRKR interacting protein 1 [Source:NCBI gene (formerly Entrezgene);Acc:101119782]
ENSOARG00000014515	MEX3B	18	1	23631292	23634285	mex-3 RNA binding family member B [Source:HGNC Symbol;Acc:HGNC:25297]
ENSOARG00000014551		24	-1	34574003	34585603
ENSOARG00000014587	UPF2	13	-1	15653985	15742363	UPF2 regulator of nonsense mediated mRNA decay [Source:NCBI gene (formerly Entrezgene);Acc:101116751]
ENSOARG00000014613	TGS1	9	1	35905057	35933866	trimethylguanosine synthase 1 [Source:NCBI gene (formerly Entrezgene);Acc:101115131]
ENSOARG00000014629	CUX1	24	-1	34631867	34950962	cut like homeobox 1 [Source:HGNC Symbol;Acc:HGNC:2557]
ENSOARG00000014712	KIDINS220	3	-1	18105955	18190292	kinase D interacting substrate 220 [Source:NCBI gene (formerly Entrezgene);Acc:101115774]
ENSOARG00000014744	DHRS3	12	1	39248189	39297932	dehydrogenase/reductase 3 [Source:NCBI gene (formerly Entrezgene);Acc:101109288]
ENSOARG00000014789	MBOAT2	3	-1	18219936	18275414	membrane bound O-acyltransferase domain containing 2 [Source:NCBI gene (formerly Entrezgene);Acc:101116033]
ENSOARG00000014969		22	-1	50590020	50590967
ENSOARG00000015218		6	-1	115634598	116296881
ENSOARG00000015233	AP1S1	24	-1	35472189	35475647	adaptor related protein complex 1 subunit sigma 1 [Source:HGNC Symbol;Acc:HGNC:559]
ENSOARG00000015262	SERPINE1	24	-1	35490295	35496243	serpin family E member 1 [Source:NCBI gene (formerly Entrezgene);Acc:100381267]
ENSOARG00000015270	TRIM56	24	-1	35524301	35526763	tripartite motif containing 56 [Source:NCBI gene (formerly Entrezgene);Acc:101120134]
ENSOARG00000015592	KITLG	3	-1	124669594	124762432	KIT ligand [Source:HGNC Symbol;Acc:HGNC:6343]
ENSOARG00000015690	NSD2	6	-1	115994066	116067786	nuclear receptor binding SET domain protein 2 [Source:NCBI gene (formerly Entrezgene);Acc:101103648]
ENSOARG00000015713	IFT81	17	1	53661638	53752199	intraflagellar transport 81 [Source:NCBI gene (formerly Entrezgene);Acc:101104093]
ENSOARG00000015728		21	-1	49777012	49777137
ENSOARG00000015729		16	-1	70550112	70887049
ENSOARG00000015744	CACNG5	11	1	61878125	61883718	calcium voltage-gated channel auxiliary subunit gamma 5 [Source:HGNC Symbol;Acc:HGNC:1409]
ENSOARG00000015756		16	1	70550213	70637013
ENSOARG00000015791	EXOC3	16	1	70645601	70670102	exocyst complex component 3 [Source:NCBI gene (formerly Entrezgene);Acc:101103266]
ENSOARG00000015819	LETM1	6	1	116086224	116110434	leucine zipper and EF-hand containing transmembrane protein 1 [Source:HGNC Symbol;Acc:HGNC:6556]
ENSOARG00000015862	SLC9A3	16	-1	70680223	70693307	solute carrier family 9 member A3 [Source:NCBI gene (formerly Entrezgene);Acc:494437]
ENSOARG00000015902		13	-1	56388549	56412278
ENSOARG00000015903	CEP72	16	1	70793975	70829621	centrosomal protein 72 [Source:NCBI gene (formerly Entrezgene);Acc:101109828]
ENSOARG00000015904	FGFR3	6	-1	116114542	116120254	fibroblast growth factor receptor 3 [Source:HGNC Symbol;Acc:HGNC:3690]
ENSOARG00000015928	TPPP	16	-1	70835826	70837933	tubulin polymerization promoting protein [Source:HGNC Symbol;Acc:HGNC:24164]
ENSOARG00000015964		6	-1	116158205	116166146	transforming acidic coiled-coil containing protein 3 [Source:NCBI gene (formerly Entrezgene);Acc:101104153]
ENSOARG00000015975	BRD9	16	-1	70855630	70872927	bromodomain containing 9 [Source:NCBI gene (formerly Entrezgene);Acc:101110363]
ENSOARG00000016060	TMEM129	6	1	116169873	116171606	transmembrane protein 129, E3 ubiquitin ligase [Source:HGNC Symbol;Acc:HGNC:25137]
ENSOARG00000016070	TRIP13	16	1	70874038	70889339	thyroid hormone receptor interactor 13 [Source:NCBI gene (formerly Entrezgene);Acc:101110620]
ENSOARG00000016090	SLBP	6	1	116179384	116187118	stem-loop binding protein [Source:NCBI gene (formerly Entrezgene);Acc:101104663]
ENSOARG00000016113		16	-1	70947557	70969043
ENSOARG00000016120		16	1	70950810	70967130
ENSOARG00000016124		16	1	70954884	71090710
ENSOARG00000016131		16	1	70983952	71013492
ENSOARG00000016137		6	1	116342251	116356946
ENSOARG00000016143	ITFG1	14	-1	15101124	15394268	integrin alpha FG-GAP repeat containing 1 [Source:NCBI gene (formerly Entrezgene);Acc:101110080]
ENSOARG00000016175		6	1	116388120	116389593	spondin 2 [Source:NCBI gene (formerly Entrezgene);Acc:101105160]
ENSOARG00000016183		6	1	116398273	116424299	transmembrane emp24 domain-containing protein 11 [Source:NCBI gene (formerly Entrezgene);Acc:101105412]
ENSOARG00000016226	ATP2A2	17	1	53803322	53859050	ATPase sarcoplasmic/endoplasmic reticulum Ca2+ transporting 2 [Source:NCBI gene (formerly Entrezgene);Acc:101104344]
ENSOARG00000016260		6	-1	116465341	116467165
ENSOARG00000016268	IDUA	6	-1	116490689	116506893	alpha-L-iduronidase [Source:NCBI gene (formerly Entrezgene);Acc:101105916]
ENSOARG00000016271	HOXC4	3	-1	132314501	132315663	homeobox C4 [Source:NCBI gene (formerly Entrezgene);Acc:101108122]
ENSOARG00000016282		6	1	116521106	116530386	diacylglycerol kinase theta [Source:NCBI gene (formerly Entrezgene);Acc:101106172]
ENSOARG00000016284	HOXC5	3	-1	132334178	132335749	homeobox C5 [Source:NCBI gene (formerly Entrezgene);Acc:101121669]
ENSOARG00000016296	HOXC6	3	-1	132338094	132340389	homeobox C6 [Source:NCBI gene (formerly Entrezgene);Acc:443349]
ENSOARG00000016306	HOXC8	3	-1	132357083	132359341	homeobox C8 [Source:NCBI gene (formerly Entrezgene);Acc:101122179]
ENSOARG00000016319	HOXC9	3	-1	132365704	132368208	homeobox C9 [Source:NCBI gene (formerly Entrezgene);Acc:443360]
ENSOARG00000016331	HOXC10	3	-1	132378989	132383129	homeobox C10 [Source:NCBI gene (formerly Entrezgene);Acc:101122425]
ENSOARG00000016342	HOXC11	3	-1	132392956	132395153	homeobox C11 [Source:NCBI gene (formerly Entrezgene);Acc:101108379]
ENSOARG00000016360	GAK	6	1	116563397	116601004	cyclin G associated kinase [Source:NCBI gene (formerly Entrezgene);Acc:101106688]
ENSOARG00000016392	CLPTM1L	16	1	71608535	71620781	CLPTM1 like [Source:HGNC Symbol;Acc:HGNC:24308]
ENSOARG00000016401		16	1	71642229	71656385
ENSOARG00000016405	PHKB	14	1	15396794	15622942	phosphorylase kinase regulatory subunit beta [Source:NCBI gene (formerly Entrezgene);Acc:101110353]
ENSOARG00000016443	SLC6A19	16	-1	71661009	71695091	solute carrier family 6 member 19 [Source:HGNC Symbol;Acc:HGNC:27960]
ENSOARG00000016469		16	-1	71698643	71699631
ENSOARG00000016472	CPLX1	6	1	116657195	116664093	complexin 1 [Source:HGNC Symbol;Acc:HGNC:2309]
ENSOARG00000016529	LIPT1	3	-1	102076649	102077788	lipoyltransferase 1 [Source:NCBI gene (formerly Entrezgene);Acc:101107774]
ENSOARG00000016536		6	-1	116684515	116695614
ENSOARG00000016608	ANAPC7	17	-1	53875546	53895506	anaphase promoting complex subunit 7 [Source:NCBI gene (formerly Entrezgene);Acc:101104605]
ENSOARG00000016707	MAEA	6	-1	116797487	116805066	macrophage erythroblast attacher, E3 ubiquitin ligase [Source:HGNC Symbol;Acc:HGNC:13731]
ENSOARG00000016735		6	-1	116816991	116817494
ENSOARG00000016756		6	-1	116844195	116845890
ENSOARG00000016807	SAMHD1	13	-1	65496603	65550669	SAM and HD domain containing deoxynucleoside triphosphate triphosphohydrolase 1 [Source:NCBI gene (formerly Entrezgene);Acc:101123484]
ENSOARG00000016816	SLC49A3	6	1	116890482	116894747	solute carrier family 49 member 3 [Source:NCBI gene (formerly Entrezgene);Acc:101108230]
ENSOARG00000016907	UNC5C	6	1	29146028	29348864	unc-5 netrin receptor C [Source:NCBI gene (formerly Entrezgene);Acc:101113935]
ENSOARG00000016949	PDE6B	6	-1	116901725	116929069	phosphodiesterase 6B [Source:NCBI gene (formerly Entrezgene);Acc:101108490]
ENSOARG00000017008		13	-1	65573366	65574278
ENSOARG00000017010	AKAP9	4	1	9183142	9351553	A-kinase anchoring protein 9 [Source:NCBI gene (formerly Entrezgene);Acc:101109958]
ENSOARG00000017110	PIGG	6	-1	116966077	117008578	phosphatidylinositol glycan anchor biosynthesis class G [Source:NCBI gene (formerly Entrezgene);Acc:101109018]
ENSOARG00000017161	BMPR1B	6	-1	29361947	29448079	bone morphogenetic protein receptor type 1B [Source:NCBI gene (formerly Entrezgene);Acc:443454]
ENSOARG00000017206	CFAP46	22	-1	50211704	50500834	cilia and flagella associated protein 46 [Source:NCBI gene (formerly Entrezgene);Acc:101110287]
ENSOARG00000017221	RBL1	13	-1	65583238	65642844	RB transcriptional corepressor like 1 [Source:NCBI gene (formerly Entrezgene);Acc:101102328]
ENSOARG00000017238	TNRC6B	3	1	215464450	215651156	trinucleotide repeat containing adaptor 6B [Source:NCBI gene (formerly Entrezgene);Acc:101107854]
ENSOARG00000017388		18	-1	19224496	19225431
ENSOARG00000017401		18	-1	19230712	19231632
ENSOARG00000017413		18	-1	19282314	19283210	myeloid-associated differentiation marker-like [Source:NCBI gene (formerly Entrezgene);Acc:101102268]
ENSOARG00000017478	NAA38	11	-1	27063289	27104853	N-alpha-acetyltransferase 38, NatC auxiliary subunit [Source:HGNC Symbol;Acc:HGNC:28212]
ENSOARG00000017499		18	-1	32421710	32422834
ENSOARG00000017535		18	1	44667546	44668340
ENSOARG00000017581	KDM6B	11	1	27093152	27100770	lysine demethylase 6B [Source:NCBI gene (formerly Entrezgene);Acc:101119656]
ENSOARG00000017586	CNPY4	24	-1	36251264	36254861	canopy FGF signaling regulator 4 [Source:NCBI gene (formerly Entrezgene);Acc:101107493]
ENSOARG00000017656	TAF6	24	1	36257890	36262248	TATA-box binding protein associated factor 6 [Source:NCBI gene (formerly Entrezgene);Acc:101123178]
ENSOARG00000017658	TMEM88	11	1	27102676	27103071	transmembrane protein 88 [Source:NCBI gene (formerly Entrezgene);Acc:101104509]
ENSOARG00000017685	HPGDS	6	1	30292023	30307578	hematopoietic prostaglandin D synthase [Source:NCBI gene (formerly Entrezgene);Acc:101116145]
ENSOARG00000017722	AP4M1	24	-1	36262581	36266129	adaptor related protein complex 4 subunit mu 1 [Source:NCBI gene (formerly Entrezgene);Acc:101107757]
ENSOARG00000017757	CYB5D1	11	1	27105527	27111748	cytochrome b5 domain-containing protein 1 [Source:NCBI gene (formerly Entrezgene);Acc:101105010]
ENSOARG00000017802	MCM7	24	1	36266756	36273815	minichromosome maintenance complex component 7 [Source:NCBI gene (formerly Entrezgene);Acc:101108015]
ENSOARG00000017828		17	-1	72027538	72184583
ENSOARG00000017851	SMARCAD1	6	-1	30314536	30402736	SWI/SNF-related, matrix-associated actin-dependent regulator of chromatin, subfamily a, containing DEAD/H box 1 [Source:NCBI gene (formerly Entrezgene);Acc:101116398]
ENSOARG00000017855	CHD3	11	1	27132435	27152030	chromodomain helicase DNA binding protein 3 [Source:NCBI gene (formerly Entrezgene);Acc:101119918]
ENSOARG00000017861	MBLAC1	24	-1	36249218	36249991	metallo-beta-lactamase domain containing 1 [Source:NCBI gene (formerly Entrezgene);Acc:101107250]
ENSOARG00000017907	ZBTB39	3	1	162324329	162326452	zinc finger and BTB domain containing 39 [Source:NCBI gene (formerly Entrezgene);Acc:101103709]
ENSOARG00000017920	COPS6	24	-1	36274400	36277034	COP9 signalosome subunit 6 [Source:HGNC Symbol;Acc:HGNC:21749]
ENSOARG00000017937	ZNF3	24	1	36287233	36293732	zinc finger protein 3 [Source:NCBI gene (formerly Entrezgene);Acc:101110990]
ENSOARG00000017952		3	1	163532333	163533292	olfactory receptor 9-like [Source:NCBI gene (formerly Entrezgene);Acc:101105405]
ENSOARG00000017966		3	1	163541284	163542222	olfactory receptor 10P1-like [Source:NCBI gene (formerly Entrezgene);Acc:101115952]
ENSOARG00000017990		3	-1	163546140	163547078	olfactory receptor 10P1-like [Source:NCBI gene (formerly Entrezgene);Acc:101105650]
ENSOARG00000018063	DGCR8	17	1	72145228	72158306	DGCR8 microprocessor complex subunit [Source:NCBI gene (formerly Entrezgene);Acc:101122137]
ENSOARG00000018195	TRMT2A	17	-1	72160607	72164891	tRNA methyltransferase 2 homolog A [Source:NCBI gene (formerly Entrezgene);Acc:101122385]
ENSOARG00000018318	RANBP1	17	1	72164845	72170719	RAN binding protein 1 [Source:NCBI gene (formerly Entrezgene);Acc:101122630]
ENSOARG00000018361	ZDHHC8	17	1	72177125	72183708	zinc finger DHHC-type palmitoyltransferase 8 [Source:HGNC Symbol;Acc:HGNC:18474]
ENSOARG00000018365		22	1	50517835	50525892
ENSOARG00000018410	RTN4R	17	-1	72254082	72258099	reticulon 4 receptor [Source:NCBI gene (formerly Entrezgene);Acc:101123413]
ENSOARG00000018413	ASXL2	3	-1	32960714	32997071	ASXL transcriptional regulator 2 [Source:NCBI gene (formerly Entrezgene);Acc:101109427]
ENSOARG00000018459	MTG1	22	1	50529782	50544643	mitochondrial ribosome associated GTPase 1 [Source:NCBI gene (formerly Entrezgene);Acc:101118653]
ENSOARG00000018467		13	1	58960755	58970701	signal-regulatory protein beta-2 [Source:NCBI gene (formerly Entrezgene);Acc:101119839]
ENSOARG00000018501	SIRPB2	13	1	58976549	58985079	signal regulatory protein beta 2 [Source:HGNC Symbol;Acc:HGNC:16247]
ENSOARG00000018543	NSFL1C	13	1	58996806	59018045	NSFL1 cofactor [Source:NCBI gene (formerly Entrezgene);Acc:101120101]
ENSOARG00000018573		12	-1	78428447	78474159
ENSOARG00000018583		22	1	50569811	50570767
ENSOARG00000018587		13	1	59028799	59048797	FKBP prolyl isomerase 1A [Source:NCBI gene (formerly Entrezgene);Acc:101105938]
ENSOARG00000018620		22	1	50678500	50679313
ENSOARG00000018632		12	-1	78495630	78507402
ENSOARG00000018693	CSRP1	12	1	78543637	78552280	cysteine and glycine rich protein 1 [Source:HGNC Symbol;Acc:HGNC:2469]
ENSOARG00000018724		4	1	111310779	111372296	cullin 1 [Source:NCBI gene (formerly Entrezgene);Acc:101106584]
ENSOARG00000018728		12	1	78545091	78548204
ENSOARG00000018755	TNNI1	12	1	78591681	78596742	troponin I1, slow skeletal type [Source:HGNC Symbol;Acc:HGNC:11945]
ENSOARG00000018756		13	1	49020246	49022223
ENSOARG00000018759		13	1	49181252	49181815
ENSOARG00000018782	ALOXE3	11	-1	27299950	27321627	arachidonate lipoxygenase 3 [Source:NCBI gene (formerly Entrezgene);Acc:101121693]
ENSOARG00000018841		4	-1	111375737	111382940
ENSOARG00000018852		12	-1	78654593	78668924
ENSOARG00000018856		4	-1	111382090	111409035
ENSOARG00000018861		11	-1	27325471	27327193
ENSOARG00000018872		3	-1	442874	443281	mitochondrial ribosomal protein L41 [Source:NCBI gene (formerly Entrezgene);Acc:101108465]
ENSOARG00000018911	PER1	11	-1	27338965	27348021	period circadian regulator 1 [Source:NCBI gene (formerly Entrezgene);Acc:100174984]
ENSOARG00000018924	TMEM232	5	-1	106642215	106911809	transmembrane protein 232 [Source:NCBI gene (formerly Entrezgene);Acc:101107020]
ENSOARG00000018937	NAV1	12	1	78762058	78878846	neuron navigator 1 [Source:NCBI gene (formerly Entrezgene);Acc:101112917]
ENSOARG00000018956	SLC25A46	5	1	106928076	106950313	solute carrier family 25 member 46 [Source:NCBI gene (formerly Entrezgene);Acc:101107280]
ENSOARG00000019001		11	1	27340880	27343397
ENSOARG00000019003		11	-1	27357863	27358752
ENSOARG00000019014		11	-1	27366556	27368401
ENSOARG00000019027	TMEM107	11	-1	27380971	27382620	transmembrane protein 107 [Source:NCBI gene (formerly Entrezgene);Acc:101106184]
ENSOARG00000019052	AURKB	11	-1	27395741	27400878	aurora kinase B [Source:NCBI gene (formerly Entrezgene);Acc:101106860]
ENSOARG00000019086	IPO9	12	1	78895912	78925417	importin 9 [Source:NCBI gene (formerly Entrezgene);Acc:101113164]
ENSOARG00000019093	SPNS2	11	1	24612444	24633665	sphingolipid transporter 2 [Source:NCBI gene (formerly Entrezgene);Acc:101112238]
ENSOARG00000019110	CTC1	11	-1	27404787	27430872	CST telomere replication complex component 1 [Source:NCBI gene (formerly Entrezgene);Acc:101122709]
ENSOARG00000019150	MYBBP1A	11	-1	24634806	24648988	MYB binding protein 1a [Source:NCBI gene (formerly Entrezgene);Acc:101112494]
ENSOARG00000019174		15	1	47609516	47611599	hemoglobin fetal subunit beta [Source:NCBI gene (formerly Entrezgene);Acc:101106199]
ENSOARG00000019176		15	1	47637413	47638421
ENSOARG00000019270		2	1	214258298	214315245
ENSOARG00000019601	USP37	2	-1	219437895	219513174	ubiquitin specific peptidase 37 [Source:NCBI gene (formerly Entrezgene);Acc:101110822]
ENSOARG00000019624	CNOT9	2	1	219522859	219551525	CCR4-NOT transcription complex subunit 9 [Source:NCBI gene (formerly Entrezgene);Acc:101111075]
ENSOARG00000019627	PLCD4	2	1	219569709	219587585	phospholipase C delta 4 [Source:NCBI gene (formerly Entrezgene);Acc:101111344]
ENSOARG00000019647		2	-1	219589375	219607794	zinc finger protein 142 [Source:NCBI gene (formerly Entrezgene);Acc:101111263]
ENSOARG00000019660	CCDC91	3	-1	185939359	186263504	coiled-coil domain containing 91 [Source:NCBI gene (formerly Entrezgene);Acc:101109260]
ENSOARG00000019967		7	1	26861449	26867419
ENSOARG00000019984	SPRED2	3	1	42867131	42897972	sprouty related EVH1 domain containing 2 [Source:NCBI gene (formerly Entrezgene);Acc:101117408]
ENSOARG00000020058	THBS1	7	1	32243494	32406527	thrombospondin 1 [Source:NCBI gene (formerly Entrezgene);Acc:101106433]
ENSOARG00000020072	FSIP1	7	-1	32262040	32462006	fibrous sheath interacting protein 1 [Source:NCBI gene (formerly Entrezgene);Acc:101106849]
ENSOARG00000020097	OTX1	3	-1	45057438	45062581	orthodenticle homeobox 1 [Source:NCBI gene (formerly Entrezgene);Acc:101116465]
ENSOARG00000020108	EHBP1	3	-1	45068842	45422494	EH domain binding protein 1 [Source:NCBI gene (formerly Entrezgene);Acc:101116893]
ENSOARG00000020132	FAM162A	1	1	185084260	185123825	family with sequence similarity 162 member A [Source:NCBI gene (formerly Entrezgene);Acc:101113293]
ENSOARG00000020139	KPNA1	1	-1	185138676	185178639	karyopherin subunit alpha 1 [Source:NCBI gene (formerly Entrezgene);Acc:101113813]
ENSOARG00000020150	PARP9	1	-1	185222510	185246839	poly(ADP-ribose) polymerase family member 9 [Source:NCBI gene (formerly Entrezgene);Acc:101114071]
ENSOARG00000020153	DTX3L	1	1	185253157	185259246	deltex E3 ubiquitin ligase 3L [Source:NCBI gene (formerly Entrezgene);Acc:101119106]
ENSOARG00000020160	PARP14	1	1	185275238	185325662	poly(ADP-ribose) polymerase family member 14 [Source:NCBI gene (formerly Entrezgene);Acc:101114323]
ENSOARG00000020221	USP34	3	1	46546179	46739009	ubiquitin specific peptidase 34 [Source:NCBI gene (formerly Entrezgene);Acc:101120484]
ENSOARG00000020233	HEG1	1	-1	187691865	187930951	heart development protein with EGF like domains 1 [Source:NCBI gene (formerly Entrezgene);Acc:101121656]
ENSOARG00000020279		3	-1	46740294	46758399	activator of HSP90 ATPase homolog 2, pseudogene [Source:NCBI gene (formerly Entrezgene);Acc:101119030]
ENSOARG00000020382		3	1	215766769	215767563
ENSOARG00000020416	ATP13A3	1	1	191315661	191393833	ATPase 13A3 [Source:NCBI gene (formerly Entrezgene);Acc:101106047]
ENSOARG00000020543	DGKG	1	1	199136381	199306850	diacylglycerol kinase gamma [Source:NCBI gene (formerly Entrezgene);Acc:101114659]
ENSOARG00000020556	IGF2BP2	1	1	199613063	199775220	insulin like growth factor 2 mRNA binding protein 2 [Source:NCBI gene (formerly Entrezgene);Acc:101115925]
ENSOARG00000020560	SENP2	1	-1	199790390	199824492	SUMO specific peptidase 2 [Source:NCBI gene (formerly Entrezgene);Acc:101116364]
ENSOARG00000020593	PID1	2	-1	230096348	230367587	phosphotyrosine interaction domain containing 1 [Source:NCBI gene (formerly Entrezgene);Acc:101104810]
ENSOARG00000020638		1	1	201457776	201515894	presenilin associated rhomboid like [Source:NCBI gene (formerly Entrezgene);Acc:101102026]
ENSOARG00000020640	MAP6D1	1	1	201515441	201521492	MAP6 domain containing 1 [Source:NCBI gene (formerly Entrezgene);Acc:101109239]
ENSOARG00000020645	YEATS2	1	-1	201528573	201610719	YEATS domain containing 2 [Source:NCBI gene (formerly Entrezgene);Acc:101109507]
ENSOARG00000020939	BSDC1	2	1	234280046	234301338	BSD domain containing 1 [Source:NCBI gene (formerly Entrezgene);Acc:101113659]
ENSOARG00000020944	TSSK3	2	-1	234303477	234305127	testis specific serine kinase 3 [Source:NCBI gene (formerly Entrezgene);Acc:101114422]
ENSOARG00000020945	FAM229A	2	1	234305686	234306327	family with sequence similarity 229 member A [Source:NCBI gene (formerly Entrezgene);Acc:101114681]
ENSOARG00000020951	HDAC1	2	-1	234327108	234362111	histone deacetylase 1 [Source:NCBI gene (formerly Entrezgene);Acc:100820752]
ENSOARG00000020961	MARCKSL1	2	1	234327337	234330069	MARCKS like 1 [Source:HGNC Symbol;Acc:HGNC:7142]
ENSOARG00000020968	LCK	2	-1	234367380	234375219	LCK proto-oncogene, Src family tyrosine kinase [Source:NCBI gene (formerly Entrezgene);Acc:100216439]
ENSOARG00000021279		4	-1	68845890	68846121
ENSOARG00000021298		4	-1	68847424	68847519
ENSOARG00000021309	5S_rRNA	8	-1	80197368	80197483	5S ribosomal RNA [Source:RFAM;Acc:RF00001]
ENSOARG00000021459	SNORA17B	3	1	2690581	2690704	small nucleolar RNA, H/ACA box 17B [Source:HGNC Symbol;Acc:HGNC:32636]
ENSOARG00000021501	U6	1	-1	185172842	185172948	U6 spliceosomal RNA [Source:RFAM;Acc:RF00026]
ENSOARG00000021504		16	1	54421632	54421711
ENSOARG00000021559		3	-1	215831256	215831332
ENSOARG00000021647		9	-1	25539725	25539881
ENSOARG00000021798		4	-1	68830191	68830552
ENSOARG00000021842		10	-1	8660491	8660644
ENSOARG00000021879		4	-1	111709317	111709409
ENSOARG00000021905		4	-1	68826736	68826901
ENSOARG00000021974		3	1	2689418	2689549
ENSOARG00000022028	SNORD115	18	1	1200447	1200527	Small nucleolar RNA SNORD115 [Source:RFAM;Acc:RF00105]
ENSOARG00000022189		4	-1	68846708	68846805
ENSOARG00000022324	U6	18	1	32160307	32160413	U6 spliceosomal RNA [Source:RFAM;Acc:RF00026]
ENSOARG00000022331	SNORD50B	8	1	50919518	50919587	small nucleolar RNA, C/D box 50B [Source:HGNC Symbol;Acc:HGNC:32722]
ENSOARG00000022348		12	-1	53265232	53265308
ENSOARG00000022396		12	-1	53266109	53266170
ENSOARG00000022473		3	-1	132334818	132334907
ENSOARG00000022502		17	1	52540351	52540484
ENSOARG00000022552	SNORD116	18	1	1121241	1121322	Small nucleolar RNA SNORD116 [Source:RFAM;Acc:RF00108]
ENSOARG00000022568	5S_rRNA	21	-1	49444632	49444733	5S ribosomal RNA [Source:RFAM;Acc:RF00001]
ENSOARG00000022599		12	-1	53266448	53266516
ENSOARG00000022620		24	1	14048473	14048599
ENSOARG00000022633		11	1	26536795	26536890
ENSOARG00000022652		4	-1	68830657	68831030
ENSOARG00000022668	MIR33B	11	1	34191189	34191282	microRNA 33b [Source:HGNC Symbol;Acc:HGNC:32791]
ENSOARG00000022669	SNORD81	12	-1	53264262	53264338	Small nucleolar RNA SNORD81 [Source:RFAM;Acc:RF00136]
ENSOARG00000022673	SNORD115	18	1	1192086	1192166	Small nucleolar RNA SNORD115 [Source:RFAM;Acc:RF00105]
ENSOARG00000022774	U6	3	-1	186118933	186119039	U6 spliceosomal RNA [Source:RFAM;Acc:RF00026]
ENSOARG00000022788		8	1	50919812	50919881
ENSOARG00000022824	Y_RNA	7	1	92816390	92816506	Y RNA [Source:RFAM;Acc:RF00019]
ENSOARG00000022880		24	1	36272901	36273015
ENSOARG00000022891	U6	1	1	103688425	103688525	U6 spliceosomal RNA [Source:RFAM;Acc:RF00026]
ENSOARG00000022914		17	1	72169023	72169124
ENSOARG00000023064		12	-1	53267464	53267543
ENSOARG00000023077		12	-1	53265801	53265865
ENSOARG00000023175		4	1	68478108	68478178
ENSOARG00000023199		11	1	26645506	26645579
ENSOARG00000023213		18	-1	23633041	23633122
ENSOARG00000023214		4	-1	68846949	68847134
ENSOARG00000023320		24	1	32625920	32626000
ENSOARG00000023451		11	1	36985290	36985415
ENSOARG00000023523		4	-1	68844995	68845195
ENSOARG00000023536		4	-1	68932562	68932663
ENSOARG00000023545		4	-1	33036078	33036171
ENSOARG00000023606		24	-1	14028393	14028457
ENSOARG00000023625		21	1	49413551	49413625
ENSOARG00000023729		6	1	24804639	24804717
ENSOARG00000023772		12	-1	53267047	53267109
ENSOARG00000023852		2	-1	97983268	97983377
ENSOARG00000023896		3	1	2652809	2652940
ENSOARG00000024091		9	-1	25472384	25472559
ENSOARG00000024115	U6	13	1	53188419	53188493	U6 spliceosomal RNA [Source:RFAM;Acc:RF00026]
ENSOARG00000024154		13	-1	49180145	49180291
ENSOARG00000024279	U6	4	1	33070049	33070155	U6 spliceosomal RNA [Source:RFAM;Acc:RF00026]
ENSOARG00000024323		4	-1	33036275	33036432
ENSOARG00000024361	U6	5	-1	51461892	51461998	U6 spliceosomal RNA [Source:RFAM;Acc:RF00026]
ENSOARG00000024377		3	1	215562199	215562260
ENSOARG00000024390		9	-1	25436822	25436954
ENSOARG00000024417		9	-1	61312724	61312813
ENSOARG00000024438	U8	11	-1	27380092	27380227	U8 small nucleolar RNA [Source:RFAM;Acc:RF00096]
ENSOARG00000024581	SNORD115	18	1	1198360	1198440	Small nucleolar RNA SNORD115 [Source:RFAM;Acc:RF00105]
ENSOARG00000024855	U6	11	1	27332801	27332906	U6 spliceosomal RNA [Source:RFAM;Acc:RF00026]
ENSOARG00000025004	5S_rRNA	17	1	51961865	51961968	5S ribosomal RNA [Source:RFAM;Acc:RF00001]
ENSOARG00000025013	U6	12	-1	39201313	39201418	U6 spliceosomal RNA [Source:RFAM;Acc:RF00026]
ENSOARG00000025048		4	1	63054784	63054858
ENSOARG00000025104	SNORD115	18	1	1194178	1194257	Small nucleolar RNA SNORD115 [Source:RFAM;Acc:RF00105]
ENSOARG00000025127	U6	11	1	55220061	55220168	U6 spliceosomal RNA [Source:RFAM;Acc:RF00026]
ENSOARG00000025240		4	-1	68741161	68742853
ENSOARG00000025241		4	-1	69995852	69997201
ENSOARG00000025261		4	1	111728443	111827559
ENSOARG00000025274		4	1	118586126	118589191
ENSOARG00000025295		5	1	16934931	16941361
ENSOARG00000025339		5	-1	107515293	107519481
ENSOARG00000025443		12	1	26847033	26855415
ENSOARG00000025450		12	1	41312990	41316656
ENSOARG00000025478		12	-1	78533854	78566392
ENSOARG00000025479		12	-1	78592696	78595254
ENSOARG00000025480		12	-1	78703719	78805612
ENSOARG00000025481		12	-1	78780120	79049714
ENSOARG00000025482		12	-1	78854696	79053579
ENSOARG00000025483		12	-1	78873778	78886087
ENSOARG00000025484		12	-1	78939953	78982616
ENSOARG00000025560		1	-1	111381716	111526818
ENSOARG00000025592		1	1	181398774	181400786
ENSOARG00000025676		17	1	44590631	44785361
ENSOARG00000025689		17	-1	62618649	62619815
ENSOARG00000025725		17	1	72194679	72198114
ENSOARG00000025848		2	1	218473677	218494696
ENSOARG00000025878		24	1	10232183	10300719
ENSOARG00000025894		24	1	35522356	35531832
ENSOARG00000025911		24	-1	40840320	40906649
ENSOARG00000025912		24	-1	40865291	40910697
ENSOARG00000025913		24	-1	40973772	41091132
ENSOARG00000025919		24	1	41650869	41652939
ENSOARG00000025920		24	1	41696723	41716039
ENSOARG00000025921		24	1	41799897	41832146
ENSOARG00000025943		3	1	2668566	2670572
ENSOARG00000025944		3	1	2690045	2693980
ENSOARG00000026004		3	-1	97954866	97957379
ENSOARG00000026026		3	-1	132180519	132308558
ENSOARG00000026036		3	1	162346698	162350833
ENSOARG00000026139		21	1	49449861	49504201
ENSOARG00000026140		21	1	49653729	49657052
ENSOARG00000026239		13	-1	49259441	49380255
ENSOARG00000026240		13	1	53357366	53499994
ENSOARG00000026272		10	-1	8590717	8719711
ENSOARG00000026273		10	1	8709264	8786349
ENSOARG00000026319		10	1	61295488	61297850
ENSOARG00000026365		11	1	34153854	34164680
ENSOARG00000026366		11	1	34164801	34285126
ENSOARG00000026367		11	1	34223969	34225395
ENSOARG00000026391		11	-1	54738796	54740870
ENSOARG00000026420		18	1	1078254	1105316
ENSOARG00000026508		9	-1	20687433	20823752
ENSOARG00000026628		6	1	116168539	116169834
ENSOARG00000026629		6	1	116370887	116371762
ENSOARG00000026630		6	-1	116388120	116445520
ENSOARG00000026631		6	-1	116437549	116454187
ENSOARG00000026632		6	-1	116483192	116488323
ENSOARG00000026634		6	1	116805686	116807320
ENSOARG00000026635		6	1	116826888	116831975
ENSOARG00000026636		6	-1	116830864	116831975
ENSOARG00000026637		6	-1	116888365	116892246
ENSOARG00000026638		6	1	116949717	116952533
ENSOARG00000026673		19	-1	59617360	59650468
ENSOARG00000026777		22	-1	50130348	50592685
ENSOARG00000026850		15	-1	80604316	80648389
ENSOARG00000026887		20	1	45822183	45836135
ENSOARG00000026989		16	-1	70469926	70666241
ENSOARG00000026990		16	-1	70675260	70791094
ENSOARG00000026991		16	1	70842533	70846169
ENSOARG00000026992		16	-1	70842533	70846169
ENSOARG00000026993		16	-1	70982405	71011669
ENSOARG00000027002		16	-1	71711496	71714068
ENSOARG00000027040		8	-1	67232575	67348942

## Sheet: Table S3
Table S3 Information of missense mutation site and gene frequency of 128 genes among 755 positive selected genes
Gene	Chromosome number	Location of sites	Groups	Alleles	Genotypic frequencies			Total number	Allele frequencies
					AA	AB	BB		A	B
RDH5	3	3:163455148	W	A-G	6	5	1	12	0.708333	0.291667
			D		59	0	0	59	1	0
HSD11B2	14	rs588284356	W	G-T	5	5	2	12	0.625	0.375
			D		59	0	0	59	1	0
HAO1	13	rs588284356	W	T-C	2	6	4	12	0.416667	0.583333
			D		52	7	0	59	0.940678	0.059322
GGT6	11	rs428887230	W	G-C	12	0	0	12	1	0
			D		6	14	39	59	0.220339	0.779661
		rs408139990	W	C-T	11	0	1	12	0.916667	0.0833333
			D		7	15	35	57	0.254386	0.745614
FAM167B	2	2:234390660	W	C-T	5	3	0	8	0.8125	0.1875
			D		59	0	0	59	1	0
ZNF212	4	rs159812392	W	G-A	5	4	3	12	0.583333	0.416667
			D		0	1	58	59	0.00847458	0.991525
		4:111705048	W	G-A	3	4	5	12	0.416667	0.583333
			D		57	0	1	58	0.982759	0.0172414
		rs419776644	W	A-C	5	6	1	12	0.666667	0.333333
			D		55	0	0	55	1	0
		rs161806383	W	A-G	5	6	0	11	0.727273	0.272727
			D		55	0	0	55	1	0
		rs606216252	W	T-C	2	4	4	10	0.4	0.6
			D		20	0	1	21	0.952381	0.047619
		4:111706766	W	G-A	1	4	5	10	0.3	0.7
			D		58	0	0	58	1	0
ADRA1D	13	rs598422239	W	C-A	1	0	9	10	0.1	0.9
			D		41	9	2	52	0.875	0.125
		rs604142724	W	C-G	0	0	10	10	0	1
			D		40	9	2	51	0.872549	0.127451
ADAMTS7	18	rs419776445	W	C-T	7	1	4	12	0.625	0.375
			D		59	0	0	59	1	0
		rs161189496	W	T-G	6	2	4	12	0.583333	0.416667
			D		57	1	1	59	0.974576	0.0254237
ECHS1	22	rs425199551	W	G-A	2	6	4	12	0.416667	0.583333
			D		59	0	0	59	1	0
		rs161517784	W	A-G	4	5	3	12	0.541667	0.458333
			D		56	2	0	58	0.982759	0.0172414
ELF3	12	rs599040726	W	A-G	8	0	0	8	1	0
			D		0	10	48	58	0.0862069	0.913793
ARHGEF15	11	rs593840486	W	G-T	6	5	1	12	0.708333	0.291667
			D		59	0	0	59	1	0
		rs599674160	W	T-C	5	5	1	11	0.681818	0.318182
			D		59	0	0	59	1	0
		11:27492470	W	G-A	2	2	1	5	0.6	0.4
			D		45	0	0	45	1	0
		rs161048303	W	G-C	2	5	5	12	0.375	0.625
			D		56	3	0	59	0.974576	0.0254237
		rs161048319	W	A-G	4	4	4	12	0.5	0.5
			D		56	3	0	59	0.974576	0.0254237
PNPLA7	3	rs405576226	W	G-T	3	2	7	12	0.333333	0.666667
			D		49	8	1	58	0.913793	0.0862069
DNAJC1	13	rs160548452	W	C-T	6	6	0	12	0.75	0.25
			D		1	7	51	59	0.0762712	0.923729
		rs160548432	W	A-T	6	5	1	12	0.708333	0.291667
			D		59	0	0	59	1	0
RAI1	11	11:34200620	W	A-G	7	3	2	12	0.708333	0.291667
			D		58	0	0	58	1	0
		rs430703321	W	A-C	5	5	2	12	0.625	0.375
			D		50	0	0	50	1	0
		11:34203148	W	C-T	6	4	2	12	0.666667	0.333333
			D		58	0	0	58	1	0
MAST2	1	rs159713465	W	T-G	3	2	7	12	0.333333	0.666667
			D		55	3	1	59	0.957627	0.0423729
VPS13B	9	rs162032501	W	T-C	1	1	10	12	0.125	0.875
			D		46	9	3	58	0.87069	0.12931
		rs1092327370	W	G-A	6	6	0	12	0.75	0.25
			D		59	0	0	59	1	0
C15orf39	18	rs161195022	W	T-C	3	6	3	12	0.5	0.5
			D		53	5	1	59	0.940678	0.059322
		rs429741435	W	T-C	4	5	3	12	0.541667	0.458333
			D		53	6	0	59	0.949153	0.0508475
		rs419393923	W	A-G	0	1	11	12	0.0416667	0.958333
			D		51	7	1	59	0.923729	0.0762712
SCAMP5	18	rs421943881	W	A-G	1	2	9	12	0.166667	0.833333
			D		58	1	0	59	0.991525	0.00847458
AGRP	14	rs417031387	W	G-A	0	1	11	12	0.0416667	0.958333
			D		2	13	43	58	0.146552	0.853448
RIPOR1	14	rs160927740	W	G-T	2	2	8	12	0.25	0.75
			D		57	2	0	59	0.983051	0.0169492
		rs427223997	W	T-C	3	2	7	12	0.333333	0.666667
			D		56	3	0	59	0.974576	0.0254237
		rs162301388	W	G-T	3	1	8	12	0.291667	0.708333
			D		55	3	0	58	0.974138	0.0258621
CTCF	14	rs424911485	W	C-T	1	2	9	12	0.166667	0.833333
			D		56	3	0	59	0.974576	0.0254237
CARMIL2	14	rs599055122	W	C-T	3	4	5	12	0.416667	0.583333
			D		58	1	0	59	0.991525	0.00847458
		rs430349979	W	T-C	2	0	10	12	0.166667	0.833333
			D		56	3	0	59	0.974576	0.0254237
		rs429618855	W	T-C	3	0	9	12	0.25	0.75
			D		56	2	0	58	0.982759	0.0172414
		rs193632493	W	C-T	0	3	9	12	0.125	0.875
			D		56	2	1	59	0.966102	0.0338983
		rs405865757	W	C-A	2	2	8	12	0.25	0.75
			D		56	3	0	59	0.974576	0.0254237
		rs159419749	W	C-T	3	1	8	12	0.291667	0.708333
			D		57	2	0	59	0.983051	0.0169492
		rs161701576	W	G-C	1	1	10	12	0.125	0.875
			D		56	3	0	59	0.974576	0.0254237
ACD	14	rs160928385	W	T-C	2	0	10	12	0.166667	0.833333
			D		57	2	0	59	0.983051	0.0169492
		rs591304436	W	G-C	2	1	8	11	0.227273	0.772727
			D		57	2	0	59	0.983051	0.0169492
		rs413999925	W	G-A	0	1	11	12	0.0416667	0.958333
			D		57	2	0	59	0.983051	0.0169492
PARD6A	14	rs416434161	W	C-T	1	0	11	12	0.0833333	0.916667
			D		56	3	0	59	0.974576	0.0254237
		rs602440420	W	C-G	6	4	2	12	0.666667	0.333333
			D		59	0	0	59	1	0
C16orf86	14	rs408862613	W	A-G	2	0	10	12	0.166667	0.833333
			D		56	2	1	59	0.966102	0.0338983
GFOD2	14	rs160928649	W	C-G	2	0	10	12	0.166667	0.833333
			D		56	3	0	59	0.974576	0.0254237
BRD4	5	rs160020648	W	C-T	4	5	3	12	0.541667	0.458333
			D		59	0	0	59	1	0
EPHX3	5	rs160020012	W	T-G	5	4	3	12	0.583333	0.416667
			D		59	0	0	59	1	0
		rs160020020	W	A-G	5	4	3	12	0.583333	0.416667
			D		59	0	0	59	1	0
NOTCH3	5	rs403898617	W	C-T	6	4	2	12	0.666667	0.333333
			D		58	1	0	59	0.991525	0.00847458
THEGL	6	rs418563268	W	G-T	11	1	0	12	0.958333	0.0416667
			D		59	0	0	59	1	0
PUSL1	12	rs160793174	W	C-T	5	5	2	12	0.625	0.375
			D		59	0	0	59	1	0
CP	1	rs423412082	W	G-C	6	4	2	12	0.666667	0.333333
			D		56	3	0	59	0.974576	0.0254237
HPS3	1	rs420018170	W	G-T	2	5	5	12	0.375	0.625
			D		0	1	56	57	0.00877193	0.991228
HLTF	1	rs162297480	W	A-G	3	3	6	12	0.375	0.625
			D		51	8	0	59	0.932203	0.0677966
G2E3	18	rs161198142	W	C-G	4	3	5	12	0.458333	0.541667
			D		58	1	0	59	0.991525	0.00847458
MPHOSPH9	17	rs160849549	W	G-A	5	4	4	13	0.538462	0.461538
			D		53	5	0	58	0.956897	0.0431034
SUN1	24	rs427943042	W	C-T	8	4	0	12	0.833333	0.166667
			D		59	0	0	59	1	0
		rs422755917	W	T-C	3	3	6	12	0.375	0.625
			D		55	3	1	59	0.957627	0.0423729
DNAAF5	24	rs416656553	W	G-A	3	3	6	12	0.375	0.625
			D		59	0	0	59	1	0
		rs427850217	W	G-A	2	6	4	12	0.416667	0.583333
			D		59	0	0	59	1	0
		rs588284356	W	C-T	3	8	1	12	0.583333	0.416667
			D		59	0	0	59	1	0
		rs595021535	W	T-C	3	9	0	12	0.625	0.375
			D		59	0	0	59	1	0
		rs426405006	W	T-C	3	8	1	12	0.583333	0.416667
			D		59	0	0	59	1	0
		rs588604987	W	G-A	4	7	1	12	0.625	0.375
			D		59	0	0	59	1	0
		rs420978520	W	T-C	3	3	6	12	0.375	0.625
			D		59	0	0	59	1	0
SLC41A3	19	rs159744280	W	T-C	4	5	3	12	0.541667	0.458333
			D		57	2	0	59	0.983051	0.0169492
		rs428943809	W	T-C	2	5	0	7	0.642857	0.357143
			D		57	2	0	59	0.983051	0.0169492
		rs159744270	W	A-G	2	4	4	10	0.4	0.6
			D		58	1	0	59	0.991525	0.00847458
B4GALNT2	11	rs402747554	W	A-C	5	4	3	12	0.583333	0.416667
			D		56	2	0	58	0.982759	0.0172414
CDHR5	21	rs419468017	W	G-A	4	7	1	12	0.625	0.375
			D		59	0	0	59	1	0
		rs405973360	W	G-A	2	1	9	12	0.208333	0.791667
			D		57	2	0	59	0.983051	0.0169492
		rs424419539	W	G-A	6	4	2	12	0.666667	0.333333
			D		59	0	0	59	1	0
		rs416865841	W	G-A	3	3	6	12	0.375	0.625
			D		53	6	0	59	0.949153	0.0508475
IRF7	21	rs408591864	W	T-A	3	6	3	12	0.5	0.5
			D		53	6	0	59	0.949153	0.0508475
		21:49462731	W	C-A	10	0	0	10	1	0
			D		36	10	5	51	0.803922	0.196078
ZC3H7A	24	rs161420625	W	G-T	6	3	3	12	0.625	0.375
			D		59	0	0	59	1	0
ABCC10	20	rs162198420	W	C-T	7	2	2	11	0.727273	0.272727
			D		3	11	44	58	0.146552	0.853448
		rs399176682	W	C-T	1	3	7	11	0.227273	0.772727
			D		46	11	0	57	0.903509	0.0964912
		rs420751214	W	T-C	9	2	1	12	0.833333	0.166667
			D		4	11	43	58	0.163793	0.836207
DLK2	20	rs594823541	W	G-C	9	3	0	12	0.875	0.125
			D		4	10	43	57	0.157895	0.842105
OR51V1	15	rs417834087	W	T-C	12	0	0	12	1	0
			D		2	18	38	58	0.189655	0.810345
SIGIRR	21	rs417518840	W	A-G	3	0	9	12	0.25	0.75
			D		51	7	1	59	0.923729	0.0762712
PLPPR1	2	rs426462176	W	C-T	12	0	0	12	1	0
			D		5	8	46	59	0.152542	0.847458
PKP3	21	21:49654907	W	T-C	5	4	1	10	0.7	0.3
			D		59	0	0	59	1	0
TASOR2	13	rs401886462	W	A-C	10	0	2	12	0.833333	0.166667
			D		2	8	47	57	0.105263	0.894737
		rs160570095	W	A-G	12	0	0	12	1	0
			D		0	15	43	58	0.12931	0.87069
		rs429327485	W	A-T	4	3	5	12	0.458333	0.541667
			D		55	3	0	58	0.974138	0.0258621
		rs160570123	W	C-T	12	0	0	12	1	0
			D		1	14	44	59	0.135593	0.864407
ACOX1	11	11:54681825	W	C-T	9	0	0	9	1	0
			D		9	0	25	34	0.264706	0.735294
FBF1	11	rs161114908	W	G-A	8	4	0	12	0.833333	0.166667
			D		0	13	45	58	0.112069	0.887931
		rs161114909	W	A-G	8	4	0	12	0.833333	0.166667
			D		0	12	46	58	0.103448	0.896552
		rs602602050	W	A-C	6	3	3	12	0.625	0.375
			D		59	0	0	59	1	0
		rs602666611	W	G-T	10	2	0	12	0.916667	0.0833333
			D		5	18	34	57	0.245614	0.754386
		rs406540958	W	A-G	2	3	7	12	0.291667	0.708333
			D		0	0	57	57	0	1
		rs419683170	W	A-G	1	2	9	12	0.166667	0.833333
			D		39	15	3	57	0.815789	0.184211
CD84	1	rs403968615	W	G-A	11	1	0	12	0.958333	0.0416667
			D		6	18	35	59	0.254237	0.745763
SLAMF1	1	rs399410022	W	C-T	2	0	10	12	0.166667	0.833333
			D		59	0	0	59	1	0
		rs413385913	W	G-A	3	8	1	12	0.583333	0.416667
			D		56	2	0	58	0.982759	0.0172414
TATDN1	9	rs401948645	W	A-G	4	5	3	12	0.541667	0.458333
			D		54	4	0	58	0.965517	0.0344828
TRIM65	11	rs162144604	W	G-A	12	0	0	12	1	0
			D		5	9	43	57	0.166667	0.833333
KNTC1	17	rs407524545	W	C-T	5	5	2	12	0.625	0.375
			D		59	0	0	59	1	0
UNK	11	rs598955701	W	C-A	8	0	0	8	1	0
			D		7	15	31	53	0.273585	0.726415
AKR1D1	4	rs429523272	W	G-A	11	1	0	12	0.958333	0.0416667
			D		4	22	33	59	0.254237	0.745763
CRIM1	3	rs160398771	W	T-C	2	1	9	12	0.208333	0.791667
			D		37	22	0	59	0.813559	0.186441
TNFRSF6B	13	13:53375474	W	A-G	4	3	2	9	0.611111	0.388889
			D		0	0	34	34	0	1
DLG4	11	rs403578635	W	G-T	3	2	7	12	0.333333	0.666667
			D		59	0	0	59	1	0
		rs416764940	W	T-G	12	0	0	12	1	0
			D		3	32	24	59	0.322034	0.677966
ATF6	1	rs411678053	W	T-C	2	3	7	12	0.291667	0.708333
			D		45	13	0	58	0.887931	0.112069
ACADVL	11	rs403578635	W	G-T	3	2	7	12	0.333333	0.666667
			D		59	0	0	59	1	0
		rs416764940	W	T-G	12	0	0	12	1	0
			D		3	32	24	59	0.322034	0.677966
FNDC11	13	rs409224859	W	C-T	4	5	3	12	0.541667	0.458333
			D		0	1	57	58	0.00862069	0.991379
MIF4GD	11	rs401068849	W	C-T	0	2	10	12	0.0833333	0.916667
			D		36	20	3	59	0.779661	0.220339
GGA3	11	rs596107022	W	T-C	0	1	10	11	0.0454545	0.954545
			D		40	15	2	57	0.833333	0.166667
PTK6	13	rs428665129	W	A-G	8	3	1	12	0.791667	0.208333
			D		0	1	56	57	0.00877193	0.991228
NUP85	11	rs415290683	W	G-A	5	5	2	12	0.625	0.375
			D		58	1	0	59	0.991525	0.00847458
NCF1	24	rs403922233	W	C-T	7	3	2	12	0.708333	0.291667
			D		52	0	0	52	1	0
MAPT	11	rs161091618	W	T-C	4	4	4	12	0.5	0.5
			D		57	2	0	59	0.983051	0.0169492
		rs423940151	W	T-C	6	3	3	12	0.625	0.375
			D		56	3	0	59	0.974576	0.0254237
BLOC1S1	3	rs159871227	W	T-C	12	0	0	12	1	0
			D		7	19	32	58	0.284483	0.715517
C3orf49	19	rs417452416	W	G-T	1	2	9	12	0.166667	0.833333
			D		36	21	2	59	0.788136	0.211864
		19:37652590	W	T-C	7	3	2	12	0.708333	0.291667
			D		59	0	0	59	1	0
		rs407799934	W	T-C	1	0	11	12	0.0833333	0.916667
			D		38	19	2	59	0.805085	0.194915
RXFP2	10	rs413132212	W	A-G	1	6	5	12	0.333333	0.666667
			D		59	0	0	59	1	0
		rs418377036	W	C-T	5	3	4	12	0.541667	0.458333
			D		59	0	0	59	1	0
DDB1	21	rs419368250	W	A-G	2	3	7	12	0.291667	0.708333
			D		50	8	0	58	0.931034	0.0689655
AADACL3	12	rs412205244	W	C-T	1	3	6	10	0.25	0.75
			D		56	2	0	58	0.982759	0.0172414
		rs405926468	W	T-C	3	3	6	12	0.375	0.625
			D		56	3	0	59	0.974576	0.0254237
		rs403696763	W	C-T	2	3	6	11	0.318182	0.681818
			D		57	2	0	59	0.983051	0.0169492
		rs403373933	W	G-A	1	5	6	12	0.291667	0.708333
			D		56	3	0	59	0.974576	0.0254237
CATSPERB	18	rs429168878	W	G-T	7	3	2	12	0.708333	0.291667
			D		59	0	0	59	1	0
		rs401445443	W	T-G	4	3	5	12	0.458333	0.541667
			D		49	7	1	57	0.921053	0.0789474
EP400	17	rs160843958	W	T-C	4	4	4	12	0.5	0.5
			D		58	1	0	59	0.991525	0.00847458
		rs425613336	W	T-C	4	1	7	12	0.375	0.625
			D		49	10	0	59	0.915254	0.0847458
		rs421009787	W	A-G	0	0	12	12	0	1
			D		39	12	6	57	0.789474	0.210526
GPR161	1	1:118422263	W	C-G	7	2	3	12	0.666667	0.333333
			D		59	0	0	59	1	0
TKFC	21	rs1085563139	W	G-A	1	1	8	10	0.15	0.85
			D		56	1	0	57	0.991228	0.00877193
		rs418912734	W	G-A	0	0	12	12	0	1
			D		49	7	2	58	0.905172	0.0948276
		rs425429816	W	A-G	0	1	11	12	0.0416667	0.958333
			D		48	9	0	57	0.921053	0.0789474
		21:39262113	W	C-T	3	6	3	12	0.5	0.5
			D		59	0	0	59	1	0
		21:39262114	W	A-G	0	1	11	12	0.0416667	0.958333
			D		51	8	0	59	0.932203	0.0677966
ATP8B3	5	rs428320343	W	G-C	1	1	10	12	0.125	0.875
			D		38	16	5	59	0.779661	0.220339
CYB561A3	21	rs161617441	W	T-C	2	3	7	12	0.291667	0.708333
			D		51	8	0	59	0.932203	0.0677966
REXO1	5	rs403696765	W	T-C	5	3	4	12	0.541667	0.458333
			D		59	0	0	59	1	0
SERPINC1	12	rs421639671	W	A-G	6	2	4	12	0.583333	0.416667
			D		59	0	0	59	1	0
PTGFR	1	rs422158759	W	A-G	5	7	0	12	0.708333	0.291667
			D		59	0	0	59	1	0
IFI44L	1	rs428344654	W	A-G	4	6	2	12	0.583333	0.416667
			D		57	2	0	59	0.983051	0.0169492
		rs159685060	W	C-T	5	5	2	12	0.625	0.375
			D		56	3	0	59	0.974576	0.0254237
		rs159685053	W	A-G	5	5	2	12	0.625	0.375
			D		57	2	0	59	0.983051	0.0169492
		rs159685046	W	C-T	3	3	6	12	0.375	0.625
			D		47	11	1	59	0.889831	0.110169
		rs193634337	W	A-C	3	0	9	12	0.25	0.75
			D		43	15	1	59	0.855932	0.144068
ABCB4	4	4:32974444	W	C-T	6	2	4	12	0.583333	0.416667
			D		59	0	0	59	1	0
		rs405654074	W	G-A	6	4	2	12	0.666667	0.333333
			D		59	0	0	59	1	0
GGA1	3	rs159921273	W	T-C	2	1	8	11	0.227273	0.772727
			D		50	8	0	58	0.931034	0.0689655
GLB1L3	15	15:80595782	W	C-G	6	5	1	12	0.708333	0.291667
			D		59	0	0	59	1	0
		rs589154022	W	C-A	7	2	3	12	0.666667	0.333333
			D		58	1	0	59	0.991525	0.00847458
PDXP	3	rs159921429	W	T-C	3	5	4	12	0.458333	0.541667
			D		52	6	1	59	0.932203	0.0677966
BNC1	18	rs599683051	W	T-C	5	5	1	11	0.681818	0.318182
			D		59	0	0	59	1	0
GLB1L2	15	rs414486377	W	A-G	4	4	3	11	0.545455	0.454545
			D		59	0	0	59	1	0
BCL2L11	3	3:105251096	W	T-C	6	5	1	12	0.708333	0.291667
			D		59	0	0	59	1	0
PRKRIP1	24	rs595004172	W	C-T	6	5	1	12	0.708333	0.291667
			D		59	0	0	59	1	0
TGS1	9	rs160650022	W	T-G	5	7	0	12	0.708333	0.291667
			D		59	0	0	59	1	0
SERPINE1	24	rs419283114	W	G-T	2	8	2	12	0.5	0.5
			D		0	6	52	58	0.0517241	0.948276
KITLG	3	rs159827606	W	G-T	7	1	4	12	0.625	0.375
			D		58	1	0	59	0.991525	0.00847458
NSD2	6	rs603634994	W	T-C	2	1	8	11	0.227273	0.772727
			D		59	0	0	59	1	0
EXOC3	16	rs161161801	W	C-T	8	2	2	12	0.75	0.25
			D		1	3	47	51	0.0490196	0.95098
BRD9	16	rs161161428	W	T-C	7	3	2	12	0.708333	0.291667
			D		58	0	0	58	1	0
TMEM129	6	rs594151401	W	A-C	5	5	1	11	0.681818	0.318182
			D		57	0	0	57	1	0
SLC6A19	16	16:71679802	W	T-C	0	1	6	7	0.0714286	0.928571
			D		42	0	0	42	1	0
LIPT1	3	3:102077299	W	C-T	12	0	0	12	1	0
			D		4	14	39	57	0.192982	0.807018
SAMHD1	13	rs412105533	W	G-A	1	3	8	12	0.208333	0.791667
			D		57	1	0	58	0.991379	0.00862069
		rs420825382	W	C-A	1	3	8	12	0.208333	0.791667
			D		58	1	0	59	0.991525	0.00847458
PDE6B	6	rs161854747	W	G-C	2	6	4	12	0.416667	0.583333
			D		0	1	56	57	0.00877193	0.991228
		rs411004813	W	G-T	4	3	5	12	0.458333	0.541667
			D		57	2	0	59	0.983051	0.0169492
		rs421103294	W	C-T	5	4	3	12	0.583333	0.416667
			D		57	2	0	59	0.983051	0.0169492
		rs430654976	W	G-A	12	0	0	12	1	0
			D		2	9	46	57	0.114035	0.885965
AKAP9	4	rs159747062	W	G-A	2	1	9	12	0.208333	0.791667
			D		49	6	4	59	0.881356	0.118644
PIGG	6	rs402873074	W	A-C	12	0	0	12	1	0
			D		0	7	52	59	0.059322	0.940678
BMPR1B	6	rs418841713	W	T-C	12	0	0	12	1	0
			D		4	7	48	59	0.127119	0.872881
CFAP46	22	22:50211783	W	C-T	6	4	1	11	0.727273	0.272727
			D		59	0	0	59	1	0
		22:50451461	W	A-G	3	3	6	12	0.375	0.625
			D		59	0	0	59	1	0
		22:50451506	W	A-G	5	6	1	12	0.666667	0.333333
			D		59	0	0	59	1	0
		22:50451530	W	C-T	6	6	0	12	0.75	0.25
			D		59	0	0	59	1	0
MCM7	24	rs161454778	W	C-T	5	1	6	12	0.458333	0.541667
			D		59	0	0	59	1	0
SMARCAD1	6	rs159955345	W	T-C	2	3	7	12	0.291667	0.708333
			D		52	6	1	59	0.932203	0.0677966
COPS6	24	rs400956706	W	G-A	5	3	4	12	0.541667	0.458333
			D		55	0	0	55	1	0
SIRPB2	13	rs428258560	W	C-T	5	5	2	12	0.625	0.375
			D		59	0	0	59	1	0
CSRP1	12	rs398838406	W	G-A	5	6	1	12	0.666667	0.333333
			D		3	7	47	57	0.114035	0.885965
ALOXE3	11	rs604795495	W	T-C	4	5	3	12	0.541667	0.458333
			D		54	5	0	59	0.957627	0.0423729
		rs592121801	W	G-A	3	6	3	12	0.5	0.5
			D		53	5	0	58	0.956897	0.0431034
NAV1	12	rs592192638	W	A-G	2	1	8	11	0.227273	0.772727
			D		48	11	0	59	0.90678	0.0932203
		rs403045320	W	A-G	2	1	9	12	0.208333	0.791667
			D		49	10	0	59	0.915254	0.0847458
TMEM107	11	rs161047675	W	A-G	3	0	9	12	0.25	0.75
			D		59	0	0	59	1	0
CTC1	11	rs161047921	W	C-T	4	6	2	12	0.583333	0.416667
			D		56	3	0	59	0.974576	0.0254237
CCDC91	3	rs414880678	W	T-C	5	6	1	12	0.666667	0.333333
			D		59	0	0	59	1	0
SPRED2	3	rs599273523	W	C-T	11	1	0	12	0.958333	0.0416667
			D		59	0	0	59	1	0
THBS1	7	rs425026885	W	G-A	12	0	0	12	1	0
			D		1	19	38	58	0.181034	0.818966
FSIP1	7	rs425026885	W	G-A	12	0	0	12	1	0
			D		1	19	38	58	0.181034	0.818966
PARP9	1	rs414249758	W	A-C	5	2	5	12	0.5	0.5
			D		59	0	0	59	1	0
DTX3L	1	rs161707262	W	T-C	6	2	4	12	0.583333	0.416667
			D		2	2	55	59	0.0508475	0.949153
		rs427565716	W	C-T	7	3	2	12	0.708333	0.291667
			D		0	4	55	59	0.0338983	0.966102
		rs159440473	W	C-T	4	2	6	12	0.416667	0.583333
			D		55	4	0	59	0.966102	0.0338983
		rs400609334	W	A-G	3	4	5	12	0.416667	0.583333
			D		55	4	0	59	0.966102	0.0338983
		rs161707267	W	C-G	7	2	3	12	0.666667	0.333333
			D		0	4	55	59	0.0338983	0.966102
		rs161707268	W	T-G	7	2	3	12	0.666667	0.333333
			D		2	2	54	58	0.0517241	0.948276
		rs159440483	W	A-T	6	3	3	12	0.625	0.375
			D		2	2	52	56	0.0535714	0.946429
		rs402010855	W	A-G	4	3	5	12	0.458333	0.541667
			D		55	4	0	59	0.966102	0.0338983
		rs424775203	W	A-G	5	3	4	12	0.541667	0.458333
			D		55	4	0	59	0.966102	0.0338983
		rs159440489	W	T-C	4	4	4	12	0.5	0.5
			D		55	4	0	59	0.966102	0.0338983
		rs418255096	W	G-A	3	3	6	12	0.375	0.625
			D		55	4	0	59	0.966102	0.0338983
		rs159440493	W	C-T	7	3	2	12	0.708333	0.291667
			D		1	3	55	59	0.0423729	0.957627
		rs159440495	W	G-T	12	0	0	12	1	0
			D		1	3	55	59	0.0423729	0.957627
		rs161707269	W	A-G	2	3	7	12	0.291667	0.708333
			D		55	3	1	59	0.957627	0.0423729
		rs606188957	W	A-G	2	3	7	12	0.291667	0.708333
			D		55	3	1	59	0.957627	0.0423729
		rs159440508	W	C-A	4	2	6	12	0.416667	0.583333
			D		55	3	1	59	0.957627	0.0423729
		rs159440510	W	C-G	7	2	3	12	0.666667	0.333333
			D		1	3	55	59	0.0423729	0.957627
		rs399196996	W	G-T	5	3	4	12	0.541667	0.458333
			D		56	3	0	59	0.974576	0.0254237
		rs408585384	W	A-T	5	3	4	12	0.541667	0.458333
			D		56	3	0	59	0.974576	0.0254237
		rs603027370	W	A-G	6	2	4	12	0.583333	0.416667
			D		1	3	54	58	0.0431034	0.956897
		rs592143608	W	G-A	7	2	3	12	0.666667	0.333333
			D		1	3	54	58	0.0431034	0.956897
		rs415891262	W	A-T	5	2	5	12	0.5	0.5
			D		55	4	0	59	0.966102	0.0338983
PARP14	1	rs430488102	W	C-G	10	2	0	12	0.916667	0.0833333
			D		1	11	47	59	0.110169	0.889831
		1:185301240	W	A-G	5	3	4	12	0.541667	0.458333
			D		59	0	0	59	1	0
ATP13A3	1	rs159451815	W	T-C	7	2	3	12	0.666667	0.333333
			D		59	0	0	59	1	0
		rs159451832	W	A-C	7	1	4	12	0.625	0.375
			D		59	0	0	59	1	0
MAP6D1	1	1:201515684	W	A-C	2	7	2	11	0.5	0.5
			D		59	0	0	59	1	0
YEATS2	1	1:201549017	W	G-C	5	6	1	12	0.666667	0.333333
			D		59	0	0	59	1	0
		1:201557280	W	C-T	4	7	1	12	0.625	0.375
			D		59	0	0	59	1	0
		rs405509762	W	T-C	5	7	0	12	0.708333	0.291667
			D		59	0	0	59	1	0

## Sheet: Table S4
Table S4 Pathway and Process Enrichment Analysis of 755 positive selected genes
Category	Term	Description	Gene_count	upload_1 (expected)	upload_1 (over/under)	upload_1 (fold Enrichment)	upload_1 (raw P-value)	FDR
GO Biological Processes	GO:0008150	biological_process	441	406.88	+	1.08	6.4e-05	0.0155
GO Biological Processes	GO:0065007	biological regulation	322	263.85	+	1.22	2.34e-07	0.000121
GO Biological Processes	GO:0050789	regulation of biological process	298	247.84	+	1.2	9.35e-06	0.00282
GO Biological Processes	GO:0050794	regulation of cellular process	284	237.8	+	1.19	4.64e-05	0.0122
GO Biological Processes	GO:0019222	regulation of metabolic process	199	133.55	+	1.49	3.98e-10	5.76e-06
GO Biological Processes	GO:0060255	regulation of macromolecule metabolic process	183	124.22	+	1.47	8.18e-09	1.98e-05
GO Biological Processes	GO:0031323	regulation of cellular metabolic process	180	121.23	+	1.48	8.16e-09	2.37e-05
GO Biological Processes	GO:0080090	regulation of primary metabolic process	171	117.01	+	1.46	6.7e-08	4.41e-05
GO Biological Processes	GO:0051171	regulation of nitrogen compound metabolic process	165	114.14	+	1.45	3e-07	0.00014
GO Biological Processes	GO:0048518	positive regulation of biological process	164	113.18	+	1.45	2.79e-07	0.000135
GO Biological Processes	GO:0048522	positive regulation of cellular process	147	103.5	+	1.42	6.09e-06	0.00196
GO Biological Processes	GO:0010468	regulation of gene expression	144	89.86	+	1.6	5.05e-09	2.44e-05
GO Biological Processes	GO:0048519	negative regulation of biological process	144	98.41	+	1.46	1.33e-06	0.000471
GO Biological Processes	GO:0032502	developmental process	140	98.35	+	1.42	9.18e-06	0.00289
GO Biological Processes	GO:0048523	negative regulation of cellular process	135	89.88	+	1.5	9.89e-07	0.000368
GO Biological Processes	GO:0031326	regulation of cellular biosynthetic process	128	77.76	+	1.65	1.24e-08	2.57e-05
GO Biological Processes	GO:0009889	regulation of biosynthetic process	128	78.87	+	1.62	3.1e-08	3e-05
GO Biological Processes	GO:0010556	regulation of macromolecule biosynthetic process	123	75.44	+	1.63	5.13e-08	3.54e-05
GO Biological Processes	GO:2000112	regulation of cellular macromolecule biosynthetic process	122	73.32	+	1.66	1.69e-08	2.72e-05
GO Biological Processes	GO:0009893	positive regulation of metabolic process	121	71.28	+	1.7	5.48e-09	1.99e-05
GO Biological Processes	GO:0019219	regulation of nucleobase-containing compound metabolic process	120	76.15	+	1.58	4.58e-07	0.00019
GO Biological Processes	GO:0051252	regulation of RNA metabolic process	115	71.57	+	1.61	3.23e-07	0.000142
GO Biological Processes	GO:0010604	positive regulation of macromolecule metabolic process	113	66	+	1.71	1.8e-08	2.61e-05
GO Biological Processes	GO:0031325	positive regulation of cellular metabolic process	109	63.1	+	1.73	2.11e-08	2.78e-05
GO Biological Processes	GO:1903506	regulation of nucleic acid-templated transcription	109	66.11	+	1.65	1.87e-07	0.000108
GO Biological Processes	GO:2001141	regulation of RNA biosynthetic process	109	66.13	+	1.65	1.88e-07	0.000105
GO Biological Processes	GO:0006355	regulation of transcription, DNA-templated	107	64.94	+	1.65	3.01e-07	0.000136
GO Biological Processes	GO:0051173	positive regulation of nitrogen compound metabolic process	105	59.88	+	1.75	1.57e-08	2.85e-05
GO Biological Processes	GO:0006357	regulation of transcription by RNA polymerase II	91	47.41	+	1.92	3.6e-09	2.61e-05
GO Biological Processes	GO:0009892	negative regulation of metabolic process	89	57.11	+	1.56	3.68e-05	0.0101
GO Biological Processes	GO:0031324	negative regulation of cellular metabolic process	81	50.21	+	1.61	2.5e-05	0.00725
GO Biological Processes	GO:0010605	negative regulation of macromolecule metabolic process	81	52.78	+	1.53	0.000132	0.0303
GO Biological Processes	GO:0010628	positive regulation of gene expression	78	42.3	+	1.84	2.78e-07	0.000139
GO Biological Processes	GO:0031328	positive regulation of cellular biosynthetic process	74	36.79	+	2.01	2.37e-08	2.46e-05
GO Biological Processes	GO:0009891	positive regulation of biosynthetic process	74	37.32	+	1.98	3.27e-08	2.96e-05
GO Biological Processes	GO:0010557	positive regulation of macromolecule biosynthetic process	72	35.42	+	2.03	2.25e-08	2.71e-05
GO Biological Processes	GO:0045935	positive regulation of nucleobase-containing compound metabolic process	72	35.97	+	2	4.69e-08	3.78e-05
GO Biological Processes	GO:0051254	positive regulation of RNA metabolic process	68	32.88	+	2.07	3.42e-08	2.92e-05
GO Biological Processes	GO:1902680	positive regulation of RNA biosynthetic process	65	31.22	+	2.08	4.83e-08	3.68e-05
GO Biological Processes	GO:1903508	positive regulation of nucleic acid-templated transcription	65	31.22	+	2.08	4.83e-08	3.5e-05
GO Biological Processes	GO:0045893	positive regulation of transcription, DNA-templated	64	29.83	+	2.15	2.28e-08	2.54e-05
GO Biological Processes	GO:0010629	negative regulation of gene expression	60	34.87	+	1.72	6.3e-05	0.0158
GO Biological Processes	GO:0031327	negative regulation of cellular biosynthetic process	53	29.1	+	1.82	4.68e-05	0.0121
GO Biological Processes	GO:0009890	negative regulation of biosynthetic process	53	29.5	+	1.8	5.53e-05	0.0141
GO Biological Processes	GO:0045944	positive regulation of transcription by RNA polymerase II	50	23.48	+	2.13	1.22e-06	0.000441
GO Biological Processes	GO:0001501	skeletal system development	29	8.82	+	3.29	7.06e-08	4.45e-05
GO Biological Processes	GO:0009792	embryo development ending in birth or egg hatching	29	13.02	+	2.23	0.000107	0.0251
GO Biological Processes	GO:0007389	pattern specification process	23	8.31	+	2.77	2.26e-05	0.0067
GO Biological Processes	GO:0003002	regionalization	22	6.57	+	3.35	2.03e-06	0.000699
GO Biological Processes	GO:0016570	histone modification	22	7.92	+	2.78	3.18e-05	0.00905
GO Biological Processes	GO:0016569	covalent chromatin modification	22	8.03	+	2.74	3.87e-05	0.0104
GO Biological Processes	GO:0009952	anterior/posterior pattern specification	17	4.33	+	3.92	4.3e-06	0.00142
GO Biological Processes	GO:0018205	peptidyl-lysine modification	17	6.04	+	2.82	0.000213	0.0483
GO Biological Processes	GO:0048705	skeletal system morphogenesis	15	4.51	+	3.33	9.16e-05	0.0218
GO Biological Processes	GO:0048706	embryonic skeletal system development	12	2.68	+	4.49	3.31e-05	0.00922
GO Biological Processes	GO:0007600	sensory perception	10	31.82	-	0.31	9.2e-06	0.00284
GO Biological Processes	GO:0007606	sensory perception of chemical stimulus	5	24.99	-	0.2	2.73e-06	0.000921
GO Biological Processes	GO:0050907	detection of chemical stimulus involved in sensory perception	4	23.92	-	0.17	9.78e-07	0.000373
GO Biological Processes	GO:0009593	detection of chemical stimulus	4	24.41	-	0.16	6.9e-07	0.00027
GO Biological Processes	GO:0050906	detection of stimulus involved in sensory perception	4	24.94	-	0.16	4.96e-07	0.0002
GO Biological Processes	GO:0051606	detection of stimulus	4	26.89	-	0.15	7.86e-08	4.75e-05
GO Biological Processes	GO:0050911	detection of chemical stimulus involved in sensory perception of smell	3	23.04	-	0.13	3.27e-07	0.000139
GO Biological Processes	GO:0007608	sensory perception of smell	3	23.57	-	0.13	2.29e-07	0.000123
GO cellular component	GO:0017053	transcription repressor complex	9	1.36	+	6.6	2.09e-05	0.00261
GO cellular component	GO:0005654	nucleoplasm	137	68.33	+	2.01	2.87e-15	5.38e-12
GO cellular component	GO:0031981	nuclear lumen	143	78.32	+	1.83	6.86e-13	4.3e-10
GO cellular component	GO:0043233	organelle lumen	155	88.6	+	1.75	1.59e-12	7.47e-10
GO cellular component	GO:0070013	intracellular organelle lumen	155	88.6	+	1.75	1.59e-12	5.97e-10
GO cellular component	GO:0031974	membrane-enclosed lumen	155	88.6	+	1.75	1.59e-12	4.98e-10
GO cellular component	GO:0005829	cytosol	111	74.9	+	1.48	2.32e-05	0.00272
GO cellular component	GO:0005634	nucleus	218	150.35	+	1.45	4.27e-10	8.02e-08
GO cellular component	GO:0043227	membrane-bounded organelle	334	256.01	+	1.3	9.69e-12	2.6e-09
GO cellular component	GO:0043231	intracellular membrane-bounded organelle	318	245.51	+	1.3	2.69e-10	5.61e-08
GO cellular component	GO:0043229	intracellular organelle	348	277.48	+	1.25	5.74e-10	9.81e-08
GO cellular component	GO:0043226	organelle	357	284.88	+	1.25	1.6e-10	3.75e-08
GO cellular component	GO:0005622	intracellular anatomical structure	399	318.84	+	1.25	9.79e-14	9.2e-11
GO cellular component	GO:0110165	cellular anatomical entity	480	443.43	+	1.08	8.66e-07	0.000136
GO cellular component	GO:0005575	cellular_component	482	446.27	+	1.08	1.09e-06	0.000158
GO cellular component	GO:0005615	extracellular space	15	34.78	-	0.43	0.000224	0.0248
GO molecular function	GO:0001222	transcription corepressor binding	8	0.84	+	9.48	5.84e-06	0.00219
GO molecular function	GO:0001221	transcription coregulator binding	11	1.86	+	5.91	6.68e-06	0.00231
GO molecular function	GO:0000977	RNA polymerase II transcription regulatory region sequence-specific DNA binding	55	27.12	+	2.03	1.44e-06	0.000808
GO molecular function	GO:0043565	sequence-specific DNA binding	66	32.55	+	2.03	9.59e-08	0.000216
GO molecular function	GO:0000976	transcription cis-regulatory region binding	58	29.11	+	1.99	1.22e-06	0.000918
GO molecular function	GO:0001067	transcription regulatory region nucleic acid binding	58	29.13	+	1.99	1.24e-06	0.000797
GO molecular function	GO:1990837	sequence-specific double-stranded DNA binding	60	30.32	+	1.98	1.2e-06	0.00108
GO molecular function	GO:0140110	transcription regulator activity	73	37.42	+	1.95	8.86e-08	0.000398
GO molecular function	GO:0000978	RNA polymerase II cis-regulatory region sequence-specific DNA binding	46	23.66	+	1.94	3.07e-05	0.00987
GO molecular function	GO:0000987	cis-regulatory region sequence-specific DNA binding	46	24.13	+	1.91	5.68e-05	0.0128
GO molecular function	GO:0000981	DNA-binding transcription factor activity, RNA polymerase II-specific	50	26.36	+	1.9	3.13e-05	0.00827
GO molecular function	GO:0003690	double-stranded DNA binding	61	32.31	+	1.89	3.94e-06	0.00161
GO molecular function	GO:0003700	DNA-binding transcription factor activity	52	27.85	+	1.87	3.27e-05	0.00817
GO molecular function	GO:0003677	DNA binding	86	49.89	+	1.72	9.53e-07	0.00107
GO molecular function	GO:0003676	nucleic acid binding	120	79.06	+	1.52	3.48e-06	0.00174
GO molecular function	GO:1901363	heterocyclic compound binding	169	126.74	+	1.33	3.51e-05	0.00832
GO molecular function	GO:0097159	organic cyclic compound binding	169	128.49	+	1.32	7.43e-05	0.0159
GO molecular function	GO:0005488	binding	335	282.46	+	1.19	3.85e-06	0.00173
GO molecular function	GO:0003674	molecular_function	430	390.24	+	1.1	3.1e-05	0.00929
GO molecular function	GO:0004984	olfactory receptor activity	3	22.57	-	0.13	4.81e-07	0.000722

## Sheet: Table S5
Table S5 Detailed infromation of genes involved in sensory perception terms
Gene_ID	Gene Name	Gene Description	Chromosome	Start	End	Direction
ENSOARG00000017952		Olfactory receptor 9-like	3	163532333	163533292	forward
ENSOARG00000004289	TAS1R3	taste 1 receptor member 3	12	49264665	49267724	reverse
ENSOARG00000010418	ATF6	activating transcription factor 6	1	111240152	111462621	forward
ENSOARG00000008064	LEF1	lymphoid enhancer binding factor 1	6	17197574	17304587	forward
ENSOARG00000011244	RDH5	retinol dehydrogenase 5	3	163451439	163458012	reverse
ENSOARG00000011195	CHRNA4	cholinergic receptor nicotinic alpha 4 subunit	13	53570788	53580288	forward
ENSOARG00000000045		Olfactory receptor 52A1	15	47724520	47725667	forward
ENSOARG00000007766	MYO1A	myosin IA	3	162272603	162301977	forward
ENSOARG00000007386		Olfactory receptor 52Z1	15	47632476	47633426	forward
ENSOARG00000008141	OPRL1	opioid related nociceptin receptor 1	13	53103292	53110212	reverse

## Sheet: Table S6
Table S6 Information of RDH5 sequence in different species in Ensemble database
Chicken	ENSGALT00000086105.2
Chimpanzee	ENSPTRT00000009311.4
Cow	ENSBTAT00000065932.2
Dog	ENSCAFT00000000100.5
Goat	ENSCHIT00010002281.1
Human	ENST00000257895.10
Mouse	ENSMUST00000026406.14
Sheep	ENSOART00000012223.1
Pig	ENSSSCT00000000384.4
Rat	ENSRNOT00000081756.2
Zebrafish	ENSDART00000177475.2

## Sheet: Fig S1
FigS1. A Schematic diagram of positive selective signal of RDH5 gene between MOU and Hu sheep. The X axis is the position of positive selected SNP site in RDH5 gene. The y-axis is the Fst. The dummy line represents that the Fst value is equal to 0.27. The sites with the Fst value greater than 0.27 are indicated in red, and which less than 0.27 are indicated in black; B. The linkage disequilibrium…

## Sheet: Fig S2
FigS2. The Construction results of two RDH5 expression carriers. A shows the electrophoretic map of small extracts of two RDH5 expression vectors. Figure B shows the sequencing result of two RDH5 expression vectors.
