# Supplementary material for: Selection signature analysis reveals RDH5 performed key function in vision during sheep domestication process
Source: Copernicus journal article supplement (doi:10.5194/aab-66-81-2023), 2023-02-23
Supplement: Supplementary file [file aab-66-81-2023-supplement-title-page.pdf › aab-66-81-2023-supplement-title-page.pdf]

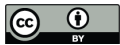

## *Supplement of*

# **Selection signature analysis reveals *RDH5* performed key function in vision during sheep domestication process**

**Ruixue Hu et al.**

*Correspondence to:* Guiqiong Liu (liuguiqiong@mail.hzau.edu.cn)

- aab-66-81-2023-supplement-title-page.pdf
- Supplementary material-R2.xlsx

The copyright of individual parts of the supplement might differ from the article licence.
